1                                    **An *Escherichia coli* nitrogen starvation response**  
2                                    **is important for mutualistic coexistence with *Rhodospseudomonas palustris***

3        Alexandra L. McCully<sup>1</sup>, Megan G. Behringer<sup>2</sup>, Jennifer R. Gliessman<sup>1</sup>, Evgeny V. Pilipenko<sup>3</sup> Jeffrey L.  
4                                    Mazny<sup>1</sup>, Michael Lynch<sup>2</sup>, D. Allan Drummond<sup>3</sup>, James B. McKinlay<sup>1#</sup>

5  
6                                    <sup>1</sup>Department of Biology, Indiana University, Bloomington, IN

7        <sup>2</sup>School of Life Sciences; Biodesign Center for Mechanisms of Evolution, Arizona State University,  
8                                    Tempe, AZ.

9        <sup>3</sup>Department of Biochemistry & Molecular Biology; Department of Human Genetics, University of  
10                                    Chicago, Chicago IL.

11

12

13        Running title: Nitrogen starvation response in a bacterial mutualism

14        #Corresponding author. 1001 E 3<sup>rd</sup> Street, Jordan Hall, Bloomington, IN 47405

15        Phone: 812-855-0359

16        Email: jmckinla@indiana.edu

17        **Conflict of interest.**

18        The authors declare no conflict of interest

19 **Abstract**

20 Microbial mutualistic cross-feeding interactions are ubiquitous and can drive important community  
21 functions. Engaging in cross-feeding undoubtedly affects the physiology and metabolism of individual  
22 species involved. However, the nature in which an individual's physiology is influenced by cross-feeding  
23 and the importance of those physiological changes for the mutualism have received little attention. We  
24 previously developed a genetically tractable coculture to study bacterial mutualisms. The coculture  
25 consists of fermentative *Escherichia coli* and phototrophic *Rhodospseudomonas palustris*. In this  
26 coculture, *E. coli* anaerobically ferments sugars into excreted organic acids as a carbon source for *R.*  
27 *palustris*. In return, a genetically-engineered *R. palustris* constitutively converts  $N_2$  into  $NH_4^+$ , providing  
28 *E. coli* with essential nitrogen. Using RNA-seq and proteomics, we identified transcript and protein levels  
29 that differ in each partner when grown in coculture versus monoculture. When in coculture with *R.*  
30 *palustris*, *E. coli* gene-expression changes resembled a nitrogen starvation response under the control of  
31 the transcriptional regulator NtrC. By genetically disrupting *E. coli* NtrC, we determined that a nitrogen  
32 starvation response is important for a stable coexistence, especially at low *R. palustris*  $NH_4^+$  excretion  
33 levels. Destabilization of the nitrogen starvation regulatory network resulted in variable growth trends and  
34 in some cases, extinction. Our results highlight that alternative physiological states can be important for  
35 survival within cooperative cross-feeding relationships.

36

37 **Importance**

38 Mutualistic cross-feeding between microbes within multispecies communities is widespread. Studying  
39 how mutualistic interactions influence the physiology of each species involved is important for  
40 understanding how mutualisms function and persist in both natural and applied settings. Using a bacterial  
41 mutualism consisting of *Rhodospseudomonas palustris* and *Escherichia coli* growing cooperatively  
42 through bidirectional nutrient exchange, we determined that an *E. coli* nitrogen starvation response is  
43 important for maintaining a stable coexistence. The lack of an *E. coli* nitrogen starvation response  
44 ultimately destabilized the mutualism and, in some cases, led to community collapse after serial transfers.

45 Our findings thus inform on the potential necessity of an alternative physiological state for mutualistic  
46 coexistence with another species compared to the physiology of species grown in isolation.

47

## 48 **Introduction**

49 Within diverse microbial communities, species engage in nutrient cross-feeding with reciprocating  
50 partners as a survival strategy (1). In cases where species are not obligate mutualists, transitioning from a  
51 free-living lifestyle to one based on cross-feeding can change the physiological state of the cells involved,  
52 the extent to which depends on the nature of the cross-feeding relationship. For example, cross-feeding  
53 can promote physiological changes that increase virulence (2, 3) or drastically alter cellular metabolism  
54 (4), in some cases allowing for lifestyles that are only possible during mutualistic growth with a partner  
55 (4–7). Aside from these examples, relatively little is known about how cell physiology is influenced by  
56 mutualistic cross-feeding, despite the prevalence of cross-feeding in microbial communities.

57         Synthetic communities, or cocultures, are ideally suited for studying the physiological responses  
58 to cooperative cross-feeding given their tractability (8, 9). We previously developed a bacterial coculture  
59 that consists of fermentative *Escherichia coli* and the N<sub>2</sub>-fixing photoheterotroph *Rhodospseudomonas*  
60 *palustris* (Fig. 1) (10). In this coculture, *E. coli* anaerobically ferments glucose into organic acids,  
61 providing *R. palustris* with essential carbon. In return, a genetically engineered *R. palustris* strain (Nx)  
62 constitutively fixes N<sub>2</sub> gas, resulting in NH<sub>4</sub><sup>+</sup> excretion that provides *E. coli* with essential nitrogen. The  
63 result is an obligate mutualism that maintains a stable coexistence and reproducible growth trends (10) as  
64 long as bidirectional nutrient cross-feeding levels are maintained within a defined range (11, 12).

65         Here we determined how nutrient cross-feeding between *E. coli* and *R. palustris* Nx alters the  
66 physiological state of each partner population. Using RNA-seq and proteomic analyses, we identified  
67 genes in both species that were differentially expressed in coculture compared to monoculture, with *E.*  
68 *coli* exhibiting more overall changes in gene expression than *R. palustris* Nx. Specifically, *E. coli* gene-  
69 expression patterns resembled that of nitrogen-deprived cells, as many upregulated genes were within the  
70 nitrogen-starvation response regulon, controlled by the master transcriptional regulator NtrC. Genetic

71 disruption of *E. coli ntrC* resulted in variable growth trends at low *R. palustris*  $\text{NH}_4^+$  excretion levels and  
72 prevented long-term mutualistic coexistence with *R. palustris* across serial transfers. Our results highlight  
73 the fact that cross-feeding relationships can stimulate alternative physiological states for at least one of  
74 the partners involved and that adjusting cell physiology to these alternative states can be critical for  
75 maintaining coexistence.

76

## 77 **Results**

78 **Engaging in an obligate mutualism alters the physiology of cooperating partners.** In our coculture, *E.*  
79 *coli* and *R. palustris* Nx carry out complementary anaerobic metabolic processes whose products serve as  
80 essential nutrients for the respective partner. Specifically, *E. coli* ferments glucose into acetate, lactate,  
81 and succinate, which serve as carbon sources for *R. palustris* Nx, while other fermentation products such  
82 as formate and ethanol accumulate; in return *R. palustris* Nx fixes  $\text{N}_2$  and excretes  $\text{NH}_4^+$  as the nitrogen  
83 source for *E. coli* (Fig. 1). We previously demonstrated that our coculture supports a stable coexistence  
84 and exhibits reproducible growth and metabolic trends when started from a wide range of starting species  
85 ratios, including single colonies (10). However, we hypothesized that coculture conditions would affect  
86 the physiology of each species, particularly *E. coli*, based on the following observations. First, as growth  
87 is coupled in our coculture, *E. coli* is forced to grow 4.6-times slower in coculture with *R. palustris* Nx  
88 than it does in monoculture with abundant  $\text{NH}_4^+$  due to slow  $\text{NH}_4^+$  cross-feeding from *R. palustris* Nx  
89 (10). In contrast, *R. palustris* Nx grows at a rate in coculture that is comparable to that in monoculture  
90 (12), consuming a mixed pool of excreted organic acids from *E. coli*. Second, coculturing pulls *E. coli*  
91 fermentation forward due to removal of inhibitory end products. For example, we observed higher yields  
92 of formate, an *E. coli* fermentation product that *R. palustris* does not consume, in cocultures compared to  
93 *E. coli* monocultures (10).

94 To determine changes in gene-expression patterns imposed by coculturing, we performed RNA-  
95 seq and comparative proteomic analyses (13) on exponential phase cocultures and monocultures of *E. coli*  
96 and *R. palustris* Nx. To make direct comparisons, all cultures were grown in the same basal anaerobic

97 minimal medium, and monocultures were supplemented with the required carbon or nitrogen sources to  
98 permit growth for each species. Cocultures and *E. coli* monocultures were provided glucose as a sole  
99 carbon source, whereas a mixture of organic acids and bicarbonate was provided to *R. palustris* Nx  
100 monocultures, as *R. palustris* does not consume glucose. For a nitrogen source, all cultures were grown  
101 under a N<sub>2</sub> headspace, and *E. coli* monocultures were further supplemented with NH<sub>4</sub>Cl, as *E. coli* is  
102 incapable of using N<sub>2</sub>. We identified several differentially expressed genes between monoculture and  
103 coculture conditions in both species with more differences observed in *E. coli* compared to *R. palustris*  
104 Nx, in agreement with our initial hypothesis (Fig. 2). For *E. coli*, out of 4377 ORFs, 55 were upregulated  
105 and 68 were downregulated (Table 1) (log<sub>2</sub> value cutoff=2). Out of 4836 ORFs in *R. palustris* Nx, 14  
106 were upregulated and 20 were downregulated (Table 1) (log<sub>2</sub> value cutoff=2). We also considered that  
107 due to lower *E. coli* abundance in coculture, the apparently larger *E. coli* gene response may be partly due  
108 to decreased resolution and thus increased error variance. Reassuringly, many of the genes identified as  
109 being differentially expressed by RNA-seq were in agreement with the proteomic results (Table 2). Both  
110 RNA-seq and proteomic analyses identified the *E. coli* ammonium transporter AmtB as an important,  
111 upregulated gene in coculture, corroborating our previous findings that *E. coli* AmtB activity is important  
112 for stable coexistence with *R. palustris* (12). Many *E. coli* genes involved in amino acid and purine  
113 biosynthesis were downregulated in coculture (Table 1, Table 2), consistent with the lower observed  
114 growth rate. Additionally, many *E. coli* flagellar and chemotaxis proteins were downregulated in  
115 coculture (Table 1, Table 2), perhaps suggesting that motility is not important for coculture growth.  
116 Alternatively, lower flagellar and chemotaxis transcript levels could be part of a general stress response  
117 (14), perhaps associated with nitrogen limitation in cocultures. Whereas many of the differentially  
118 expressed *E. coli* genes have been characterized in the literature, the *R. palustris* genes showing the  
119 largest differential expression were uncharacterized genes encoding upregulated putative  
120 alcohol/aldehyde dehydrogenases and a downregulated putative TonB-dependent receptor/siderophore  
121 (Table 1, Table 2). Together, these datasets provide insight on how engaging in obligate cross-feeding  
122 changes the lifestyle of each partner.

123

124 **An *E. coli* nitrogen starvation response is important for mutualistic growth with *R. palustris*.** We

125 chose to further examine differential gene expression patterns in *E. coli* as its growth rate and

126 fermentation profile are drastically affected by coculturing, whereas the *R. palustris* Nx growth rate is

127 similar to that in monoculture. We identified several *E. coli* genes and proteins that were upregulated in

128 coculture with *R. palustris* Nx compared to monoculture growth (Table 1, Table 2). We hypothesized that

129 the deletion of highly upregulated *E. coli* genes would negatively affect its growth in coculture. We made

130 deletions in *E. coli* genes that were identified in both RNA-seq and proteome datasets as well as the

131 highest upregulated *E. coli* transcript (*rutA*). We did not examine the effect of deleting *amtB* in this case

132 as we previously determined it to be important for coculture growth (12). These selected *E. coli* genes

133 were all involved in metabolism of alternative nitrogen sources such as D-ala-D-ala dipeptides (*ddpX*,

134 *ddpA*) (15), pyrimidines (*rutA*) (16), amino acids (*argT*) (17), and polyamines (*patA*, *potF*) (18). In

135 monocultures with 15mM NH<sub>4</sub>Cl, there were negligible differences in growth or fermentation profiles

136 between WT *E. coli* and any of the single deletion mutants (Fig. S1). These results are consistent with

137 findings by others, as these genes are only important when scavenging alternative nitrogen sources that

138 are not present in our defined medium. We next tested these *E. coli* mutants in coculture with *R. palustris*

139 Nx to determine if these genes were important when NH<sub>4</sub><sup>+</sup> is slowly cross-fed from *R. palustris* Nx. All

140 cocultures using the *E. coli* mutants paired with *R. palustris* Nx exhibited similar growth and population

141 trends to cocultures with WT *E. coli* (Fig. 3). Additionally, there were no significant differences in the

142 growth rates, growth yields, or product yields from cocultures containing the *E. coli* mutants (Fig. S2).

143 These data suggest that none of these highly expressed *E. coli* genes are solely important for coculture

144 growth. While it is possible that synergistic expression of these genes is important for *E. coli*'s lifestyle in

145 coculture, the actual nitrogen sources accessed by expression of these genes are absent in the defined

146 medium. Thus, unless *E. coli* gains access to alternative nitrogen sources that we are unaware of in

147 coculture with *R. palustris* Nx, synergistic expression of these genes likely provides little to no benefit.

148 Even though individual deletions of the *E. coli* genes showing high expression in coculture had  
149 no effect on coculture trends, we noted that they were all involved in nitrogen scavenging and fell within  
150 the regulon of the transcription factor, NtrC, which controls the nitrogen starvation response (19). During  
151 nitrogen limitation, the sensor kinase NtrB phosphorylates the response regulator NtrC (19).  
152 Phosphorylated NtrC then binds to DNA and activates expression of ~45 genes (20), including those we  
153 tested genetically above and *amtB*, which we previously determined to be important for coculture growth  
154 (12). To examine the importance of the *E. coli* nitrogen starvation response in coculture, we deleted *ntrC*.  
155 We first checked for any general defects of the resulting  $\Delta$ NtrC mutant in monoculture with 15 mM  
156 NH<sub>4</sub>Cl and found that it exhibited similar growth and metabolic trends to WT *E. coli* (Fig. S3). We then  
157 paired *E. coli*  $\Delta$ NtrC with *R. palustris* Nx in coculture. Compared to cocultures using WT *E. coli*,  
158 cocultures with *E. coli*  $\Delta$ NtrC exhibited slower growth rates, longer lag periods (Fig. 4A), and lower final  
159 *E. coli* cell densities (Fig. 4D). The long lag phase was less prominent in cocultures inoculated from  
160 single colonies (Fig. S4A) compared to cocultures inoculated with a 1% dilution of stationary cocultures  
161 (Fig. 4A). This result suggests that starting *E. coli*  $\Delta$ NtrC cocultures from single colonies stimulated early  
162 growth, perhaps by increasing the *E. coli* frequency to be similar to that of *R. palustris* when started with  
163 colonies of similar sizes rather than a dilution of stationary cocultures wherein the *E. coli* frequency was  
164 low (~0.1%; Fig. 4D). A higher initial *E. coli* frequency might help *E. coli* acquire excreted NH<sub>4</sub><sup>+</sup> before  
165 it is taken back up by *R. palustris* cells and thereby promote reciprocal cross-feeding, similar to what we  
166 observed previously in cocultures with *E. coli*  $\Delta$ AmtB mutants that were defective for NH<sub>4</sub><sup>+</sup> uptake (12).

167 The overall coculture metabolism was also altered when *E. coli*  $\Delta$ NtrC was paired with *R.*  
168 *palustris* Nx. In cocultures pairing WT *E. coli* with *R. palustris* Nx, glucose is typically fully consumed  
169 within 5 days coinciding with the accumulation of formate and ethanol (10). Cocultures pairing *E. coli*  
170  $\Delta$ NtrC with *R. palustris* Nx differed in this regard, leaving ~40% of the glucose unconsumed after 10  
171 days and exhibiting little to no formate and ethanol accumulation (Fig. S4B). Even despite the lower  
172 glucose consumption, the final *R. palustris* cell density of cocultures pairing *R. palustris* Nx with *E. coli*  
173  $\Delta$ NtrC was similar to those with WT *E. coli*. This unexpectedly high cell density could be explained by

174 consumption of formate and ethanol by *R. palustris* Nx, though we have never observed consumption of  
175 formate by *R. palustris* Nx in monoculture. Alternatively, a lack of formate and/or ethanol production by  
176 *E. coli* could explain the high cell density if the fermentation profile were shifted towards organic acids  
177 that *R. palustris* normally consumes, namely acetate, lactate and succinate. Together, these data indicate  
178 that misregulation of the nitrogen starvation response affected coculture growth and metabolism.

179 As noted above, the low *E. coli*  $\Delta$ NtrC population and decreased coculture growth rate when  
180 paired with *R. palustris* Nx resembled trends from cocultures that contained *E. coli*  $\Delta$ AmtB mutants (12).  
181 We previously found that the *E. coli*  $\text{NH}_4^+$  transporter, AmtB, was required for coexistence with *R.*  
182 *palustris* Nx across serial transfers as the transporter gives *E. coli* a competitive advantage in acquiring  
183 the transiently available  $\text{NH}_4^+$  before it can be reclaimed by the *R. palustris* population (12). To determine  
184 if *E. coli*  $\Delta$ NtrC was capable of maintaining a stable coexistence in coculture, we inoculated cocultures of  
185 *E. coli*  $\Delta$ NtrC paired with *R. palustris* Nx at equivalent CFUs and performed serial transfers every 10  
186 days. While average final *E. coli* frequencies were consistently between 0.6 – 2.8 % (Fig. 5A), the values  
187 became variable over serial transfers, as did coculture growth rates, lag periods, and net changes in both  
188 *E. coli* and *R. palustris* cell densities (Fig. 5). This variability was due to 2 of the 4 lineages exhibiting  
189 improved coculture growth over successive transfers (Fig. 5B, C), perhaps due to the emergence of  
190 compensatory mutations, while the other two lineages showed declining growth trends (Fig. 5D, E).  
191 Indeed, by transfers 5 and 6 there was little to no coculture growth in the slower-growing lineages (Fig.  
192 4D, E). The heterogeneity in growth trends through serial transfers of cocultures with *E. coli*  $\Delta$ NtrC is in  
193 stark contrast to the stability of cocultures with WT *E. coli*, which we have serially transferred over 100  
194 times with no extinction events (McKinlay, unpublished data). The nitrogen starvation response thus  
195 appears to be important for long-term survival of the mutualism.

196  
197 **Increased  $\text{NH}_4^+$  cross-feeding levels can compensate for the absence of a nitrogen starvation**  
198 **response.** The NtrC regulon is critical during periods of nitrogen starvation, activating a wide variety of  
199 genes that are important for scavenging diverse nitrogen sources (20). We hypothesized that higher *R.*



200 *palustris* NH<sub>4</sub><sup>+</sup> cross-feeding levels could mitigate the poor growth of *E. coli* ΔNtrC in coculture by  
201 making the nitrogen starvation response less important for survival. Previously, we engineered an *R.*  
202 *palustris* Nx strain that excretes 3-times more NH<sub>4</sub><sup>+</sup> by deleting *R. palustris* NH<sub>4</sub><sup>+</sup> transporters encoded by  
203 *amtB1* and *amtB2* (NxΔAmtB) (10). N<sub>2</sub>-fixing bacteria use AmtB to reacquire NH<sub>4</sub><sup>+</sup> that leaks outside the  
204 cell, and ΔAmtB mutants thus accumulate NH<sub>4</sub><sup>+</sup> into the supernatant (10, 12, 21). In agreement with our  
205 hypothesis, cocultures with *R. palustris* NxΔAmtB exhibited similar growth trends regardless of the *E.*  
206 *coli* strain used (Fig. 4B, D). As *R. palustris* NxΔAmtB excretes more NH<sub>4</sub><sup>+</sup> than *R. palustris* Nx, it was  
207 previously shown to result in faster WT *E. coli* growth and subsequent fermentation rates in coculture,  
208 ultimately leading to the accumulation of consumable organic acids (Fig. S4B) and acidification of the  
209 medium, inhibiting *R. palustris* growth (10). Cocultures pairing *R. palustris* NxΔAmtB and *E. coli* ΔNtrC  
210 similarly exhibited growth (Fig. 4B,D), and fermentation profile trends (Fig. S4B) that were  
211 indistinguishable from cocultures pairing *R. palustris* NxΔAmtB with WT *E. coli*. These similar trends  
212 indicate that high *R. palustris* NH<sub>4</sub><sup>+</sup> excretion can eliminate the trends observed when the *E. coli* nitrogen  
213 starvation response is compromised due to a ΔNtrC mutation.

214 One possibility for why high NH<sub>4</sub><sup>+</sup> cross-feeding levels eliminate the need for *E. coli* *ntrC* is that  
215 the free NH<sub>4</sub><sup>+</sup> levels might be sufficiently high enough to prevent activation of the *E. coli* NtrC regulon.  
216 However, comparative RNA-seq and proteomic analyses revealed that the same *E. coli* genes within the  
217 NtrC regulon that were highly upregulated in cocultures pairing WT *E. coli* with *R. palustris* Nx were  
218 also upregulated in cocultures with *R. palustris* NxΔAmtB (Table 1, Table 2). Thus, even though the *E.*  
219 *coli* nitrogen-starvation response is activated when cocultured with *R. palustris* NxΔAmtB, this response  
220 is likely dispensable if there is sufficiently high NH<sub>4</sub><sup>+</sup> cross-feeding.

221  
222 ***E. coli* NtrC is required for adequate AmtB expression to access cross-fed NH<sub>4</sub><sup>+</sup> in coculture.** While  
223 a high level of *R. palustris* NH<sub>4</sub><sup>+</sup> excretion can compensate for an improper *E. coli* nitrogen-starvation  
224 response, less NH<sub>4</sub><sup>+</sup> excretion could potentially exaggerate problems emerging from the absence of NtrC.  
225 We previously constructed an *R. palustris* ΔAmtB strain that excreted 1/3<sup>rd</sup> of the NH<sub>4</sub><sup>+</sup> than *R. palustris*

226 Nx in monoculture and which could not coexist in coculture with *E. coli*  $\Delta$ AmtB (12). The reason for this  
227 lack of coexistence was due to *R. palustris*  $\Delta$ AmtB outcompeting *E. coli*  $\Delta$ AmtB for the lower level of  
228 transiently available  $\text{NH}_4^+$ , thus limiting *E. coli* growth and thereby the reciprocal supply of fermentation  
229 products to *R. palustris* (12). Expression of *E. coli* *amtB* is thus important in coculture in order to  
230 maintain coexistence. Indeed, RNA-seq and proteomic analyses revealed that *E. coli* AmtB transcript and  
231 protein levels were upregulated in all cocultures pairing WT *E. coli* with any of the three *R. palustris*  
232 strains (Nx, Nx $\Delta$ AmtB,  $\Delta$ AmtB) (Table 1, Table 2). We thus wondered whether *E. coli*  $\Delta$ NtrC would  
233 coexist with the low  $\text{NH}_4^+$ -excreting strain *R. palustris*  $\Delta$ AmtB in coculture, as *E. coli* *amtB* expression is  
234 transcriptionally activated by NtrC. Consistent with our previous findings, *R. palustris*  $\Delta$ AmtB supported  
235 a high relative WT *E. coli* population in coculture (Fig. 4D) (12). When cocultured with WT *E. coli*, *R.*  
236 *palustris*  $\Delta$ AmtB responds to  $\text{NH}_4^+$  loss to *E. coli* by upregulating nitrogenase activity since it has a wild-  
237 type copy of NifA (12). As a result, *R. palustris*  $\Delta$ AmtB cross-feeds enough  $\text{NH}_4^+$  to stimulate a high WT  
238 *E. coli* frequency and subsequent accumulation of consumable organic acids, similar to cocultures with *R.*  
239 *palustris* Nx $\Delta$ AmtB (Fig 3D, Fig. S4B) (12). In contrast, when we paired *E. coli*  $\Delta$ NtrC with *R. palustris*  
240  $\Delta$ AmtB, little to no coculture growth was observed (Fig. 4C), similar to previous observations in  
241 cocultures pairing *E. coli*  $\Delta$ AmtB with *R. palustris*  $\Delta$ AmtB (12). Cocultures inoculated with single  
242 colonies of each species in this pairing grew to low cell densities (Fig. S4A), and cocultures inoculated  
243 from these cocultures resulted in little to no growth, even after prolonged incubation (Fig. 4C).

244 As AmtB is under the control of NtrC (20), we hypothesized that cocultures pairing *E. coli*  $\Delta$ NtrC  
245 with *R. palustris*  $\Delta$ AmtB resulted in insufficient *E. coli* *amtB* expression, leading to a decreased ability to  
246 capture  $\text{NH}_4^+$ , which *R. palustris* will require if given the chance (12). We thus predicted that increased  
247 expression of *amtB* in *E. coli*  $\Delta$ NtrC would result in increased net growth of both species, as *E. coli*  
248  $\Delta$ NtrC would be more competitive for essential  $\text{NH}_4^+$  and be able to grow and produce more organic acids  
249 for *R. palustris*  $\Delta$ AmtB. To test this prediction, we obtained a plasmid harboring an IPTG-inducible copy  
250 of *amtB* (*pamtB*) for use in *E. coli*  $\Delta$ NtrC. AmtB is typically tightly regulated and only expressed when

251  $\text{NH}_4^+$  concentrations are below 20  $\mu\text{M}$ , as cells acquire sufficient  $\text{NH}_4^+$  through passive diffusion of  $\text{NH}_3$   
252 across the membrane at higher concentrations (22). Additionally, excessive  $\text{NH}_4^+$  uptake through AmtB  
253 transporters that exceeds the rate of assimilation can result in a futile cycle, as excess  $\text{NH}_3$  inevitably  
254 diffuses outside the cell (19). We first tested the effect of *pamtB* in WT *E. coli* monocultures with 15 mM  
255  $\text{NH}_4\text{Cl}$ . Induction with 1 mM IPTG prevented growth whereas 0.1 mM IPTG permitted growth albeit at a  
256 decreased growth rate (Fig. S5). We thus decided to use 0.1 mM IPTG to induce *amtB* expression in all  
257 cocultures described below. In cocultures pairing *E. coli*  $\Delta\text{NtrC}$  *pamtB* with *R. palustris*  $\Delta\text{AmtB}$ , more  
258 growth was observed than in cocultures with *E. coli*  $\Delta\text{NtrC}$  harboring an empty vector (pEV) (Fig. 6A). In  
259 cocultures with *E. coli*  $\Delta\text{NtrC}$  pEV, the *R. palustris*  $\Delta\text{AmtB}$  cell density increased whereas the *E. coli* cell  
260 density did not (Fig. 6B). The *R. palustris* growth was likely due to growth-independent cross-feeding of  
261 fermentation products from *E. coli* maintenance metabolism, a phenomenon we described previously  
262 (11). In contrast, cell densities of both species increased in cocultures pairing *R. palustris*  $\Delta\text{AmtB}$  with *E.*  
263 *coli*  $\Delta\text{NtrC}$  *pamtB* (Fig. 6C), in agreement with our hypothesis that poor *E. coli* *amtB* expression  
264 contributed to the lack of growth in this coculture pairing. While *E. coli* *amtB* expression in this coculture  
265 pairing was sufficient to restore growth of both species, there are likely other genes within the NtrC  
266 regulon that contribute to *E. coli* growth in coculture. For example, the *E. coli* NtrC-regulated  
267 serine/threonine kinase *yeaG* has been shown to play a role in survival during nitrogen starvation by  
268 promoting metabolic heterogeneity (23). Indeed, *E. coli* *yeaG* and its associated protein of unknown  
269 function *yeaH* are both highly upregulated in coculture (Table 1). Thus, while we cannot rule out that  
270 other genes within the *E. coli* *ntrC* regulon are not important for coculture growth, the necessity of NtrC  
271 to upregulate *amtB* is clearly important.

272

## 273 **Discussion**

274 In this study, we found that reciprocal nutrient cross-feeding between *E. coli* and *R. palustris* resulted in  
275 significant changes in gene expression in both species compared to monocultures. Based on the RNA-seq  
276 and proteomic analyses, we determined that *E. coli* alters its physiology to adopt a nitrogen-starved state

277 in response to low  $\text{NH}_4^+$  cross-feeding levels from *R. palustris*. We subsequently determined that this  
278 nitrogen-starved state is important for coexistence as genetic elimination of the master transcriptional  
279 regulator, NtrC, resulted in variable population outcomes. Mutualistic nutrient cross-feeding has also been  
280 shown to change the lifestyle of interacting partners in other systems. In natural communities, nutrient  
281 cross-feeding can alter gene-expression patterns to adapt each species to a syntrophic lifestyle (24–27). In  
282 some cases, the lifestyles exhibited within a mutualism might not even be possible during growth in  
283 isolation. For example, in synthetic communities that pair the sulfate-reducer *Desulfovibrio vulgaris* with  
284 the methanogen *Methanococcus maripaludis*, the methanogen consumes  $\text{H}_2$ , which maintains low partial  
285 pressures that permit the sulfate reducer to adopt a fermentative lifestyle that would otherwise be  
286 thermodynamically infeasible (5). Similarly, in an experimental *Geobacter* coculture, direct electron  
287 transfer from *Geobacter metallireducens* to *Geobacter sulfurreducens* makes ethanol fermentation by *G.*  
288 *metallireducens* thermodynamically possible (7).

289         Similar to our mutualistic system, the mutualism between *D. vulgaris* and *M. maripaludis*  
290 represents a facultative mutualism, at least in the short term prior to evolutionary erosion of independent  
291 lifestyles (28). For mutualistic relationships to persist between partners that are conditionally capable of a  
292 free-living lifestyle, the relationship must exhibit resilience, or the ability to recover its function after a  
293 disturbance (29). One important resilience factor is the activation of regulatory networks that allow for  
294 microbes to quickly respond to environmental perturbations. Whereas flexible gene expression is useful  
295 for an individual microbe's survival, excessive flexibility can sometimes lead to community collapse  
296 between mutualists in a fluctuating environment (30, 31). In the coculture of *D. vulgaris* and *M.*  
297 *maripaludis*, alternating between coculture and monoculture conditions, which require different metabolic  
298 lifestyles, resulted in community collapse (30, 31). Surprisingly, community collapse could be avoided by  
299 mutations that disrupted the *D. vulgaris* regulatory response needed to adapt cells for optimal growth rates  
300 in monoculture (30). Disruption of this regulatory response resulted in a heterogeneous *D. vulgaris*  
301 population, ensuring that a subpopulation would be primed for immediate mutualistic growth upon  
302 transition between growth conditions (31). In our system, the *E. coli* nitrogen starvation regulatory

303 network was specifically activated by coculturing with *R. palustris* and was important for coculture  
304 stability. It is currently unclear if transitioning *E. coli* between monoculture and coculture conditions  
305 would result in similar community collapse or whether the NtrC-regulated network would adjust rapidly  
306 enough to meet the demands of each condition.

307 Nutrient starvation and other stress responses are widely conserved in diverse microbes and are  
308 primarily regarded as necessary for an individual's survival in nutrient-limited environments (32–35).  
309 Many microbial communities are composed of primarily slow-growing or even non-growing  
310 subpopulations (36–38). However, lack of microbial growth in these communities does not imply  
311 cessation of cross-feeding, as bacteria often carry out growth-independent maintenance processes at slow  
312 rates (39), and such activities can be coupled to cross-feeding (11). Our findings suggest that nutrient  
313 starvation and perhaps other stress responses can help stabilize microbial cross-feeding interactions,  
314 especially at low nutrient cross-feeding levels. The extent to which specific starvation or stress responses  
315 are active in diverse mutualistic relationships remains unclear, yet likely depends on the environmental  
316 context. Together our results highlight the important role that alternate physiological states, including  
317 stress responses, can play in establishing and maintaining mutualistic cross-feeding relationships.

318

## 319 **Materials and Methods**

320 **Strains and growth conditions.** Strains, plasmids, and primers are listed in Table S1. All *R. palustris*  
321 strains contained  $\Delta uppE$  and  $\Delta hupS$  mutations to facilitate accurate colony forming unit (CFU)  
322 measurements by preventing cell aggregation (40) and to prevent H<sub>2</sub> uptake, respectively. *E. coli* was  
323 cultivated on Luria-Bertani (LB) agar and *R. palustris* on defined mineral (PM) (41) agar with 10 mM  
324 succinate. (NH<sub>4</sub>)<sub>2</sub>SO<sub>4</sub> was omitted from PM agar for determining *R. palustris* CFUs. Monocultures and  
325 cocultures were grown in 10 mL of defined M9-derived coculture medium (MDC) (10) in 27-mL  
326 anaerobic test tubes under 100% N<sub>2</sub> as described (10). For harvesting RNA and protein, 100-mL cultures  
327 were grown in 260-mL serum vials. In both cases, MDC was supplemented with cation solution (1 % v/v;  
328 100 mM MgSO<sub>4</sub> and 10 mM CaCl<sub>2</sub>) and glucose (25 mM), unless indicated otherwise. *R. palustris*

329 monocultures were further supplemented with 15 mM sodium bicarbonate, 7.8 mM sodium acetate, 8.7  
330 mM disodium succinate, 1.5 mM sodium lactate, 0.3 mM sodium formate, and 6.7mM ethanol. *E. coli*  
331 monocultures were further supplemented with 2.5 mM NH<sub>4</sub>Cl. Kanamycin was added to a final  
332 concentration of 30 µg/ml for *E. coli* where appropriate. Chloramphenicol was added to a final  
333 concentration of 5 µg/ml for both *R. palustris* and *E. coli* where appropriate. All cultures were grown at  
334 30°C laying horizontally under a 60 W incandescent bulb with shaking at 150 rpm. Starter cocultures  
335 were inoculated with 200 µL MDC containing a suspension of a single colony of each species. Test  
336 cocultures and serial transfers were inoculated using a 1% dilution from starter cocultures. For  
337 experiments requiring a starting species ratio of 1:1, *E. coli* and *R. palustris* starter monocultures were  
338 grown to equivalent cell densities, and inoculated at equal volumes.

339 **Generation of *E. coli* mutants.** P1 transduction (42) was used to introduce deletions from Keio  
340 collection strains into MG1655. The genotype of kanamycin-resistant colonies was confirmed by PCR  
341 and sequencing.

342 **Analytical procedures.** Cell density was assayed by optical density at 660 nm (OD<sub>660</sub>) using a Genesys  
343 20 visible spectrophotometer (Thermo-Fisher, Waltham, MA, USA). Growth curve readings were taken  
344 in culture tubes without sampling (i.e., tube OD<sub>660</sub>). Specific growth rates were determined using readings  
345 between 0.1-1.0 OD<sub>660</sub> where there is linear correlation between cell density and OD<sub>660</sub>. Final OD<sub>660</sub>  
346 measurements were taken in cuvettes and samples were diluted into the linear range as necessary.  
347 Glucose, organic acids, formate and ethanol were quantified using a Shimadzu high-performance liquid  
348 chromatograph (HPLC) as described (43).

349 **Sample collection for transcriptomics and proteomics.** Monocultures and cocultures were grown in  
350 100-mL volumes to late exponential phase and chilled in an ice-water bath. A 1-mL sample was collected  
351 for protein quantification using a Pierce BCA Protein Assay Kit as per the manufacturer's protocol. A 5-  
352 ml sample was removed for RNA extraction and 90 ml was used for proteomic analysis. All samples were  
353 centrifuged at 4°C, supernatants discarded, and cell pellets frozen in liquid N<sub>2</sub> and stored at -80°C.

354 **RNA-seq.** Total RNA was isolated from cell pellets using the RNeasy kit (Qiagen, Valencia, CA, USA)  
355 as per the manufacturer's protocol. In order to calculate baseline expression levels, RNA sequencing  
356 reads resulting from monoculture were mapped to their corresponding reference genome (*E. coli* str. K-12  
357 substr. MG1655 (44), NCBI RefSeq: NC\_000913.3; *R. palustris* CGA0009 (45), NCBI RefSeq:  
358 NC\_005296.1) using the Tuxedo protocol for RNA expression analysis (46) (Workflow deposited  
359 at <https://github.com/behrling/Task3/RNASeq>). Specifically, split-reads were aligned to the reference  
360 genome with Tophat2 (v.2.1.0) (47) and Bowtie2 (v.2.1.0) (48). Following mapping, transcripts were  
361 assembled with cufflinks (v.2.2.0) (49), and differential expression was identified with the cufflinks tool,  
362 cuffdiff (v.2.2.0). To assure that crossmapping of homologous sequencing reads would not complicate  
363 expression analysis from the co-culture experiments, monoculture reads were additionally mapped as  
364 described to the opposing genome. As all potential crossmapping was confined to residual rRNA reads,  
365 these regions were excluded from the analysis and the co-culture RNA-seq reads were analyzed by  
366 mapping the sequenced reads to both reference genomes with no further correction.

367 **Preparation of protein samples for MS.** Cell pellets were resuspended in 1 mL total protein buffer  
368 (TPB; 20mM HEPES-NaOH pH7.4, 150mM NaCl, 2mM EDTA, 0.2mM DTT, 1:100 PMSF, 1:100  
369 protease inhibitors cocktail IV) and sonicated at 20% intensity (7 seconds on, 7 seconds off) for 5 min in  
370 an ice bath. Then 1/10 volume of 20% SDS was added. Samples were vortexed, boiled for 5 min, and  
371 immediately placed on ice. Debris was cleared by centrifuging for 30 s at 10,000 x g at 4°C and the  
372 supernatant was collected. Protein content of different lysates was analyzed by Coomassie staining  
373 following SDS-PAGE and sample aliquots containing 200 µg protein were subjected to  
374 chloroform:methanol protein extraction as described (50).

375 **Analysis by LC-MS/MS.** Mass spectrometry was performed at the Mass Spectrometry and Proteomics  
376 Research Laboratory (MSPRL), FAS Division of Science, at Harvard University. Samples were  
377 individually labeled with tandem mass tag (TMT) 10-plex reagents according to the manufacturer's  
378 protocol (ThermoFisher Scientific) and mixed. The mixed sample was dried in a speedvac and re-diluted  
379 with Buffer A (0.1 % formic acid in water) for injection for HPLC runs. The sample was submitted for a

380 single liquid chromatography coupled to tandem mass spectrometry (LC-MS/MS) experiment which was  
381 performed on a LTQ Orbitrap Elite (ThermoFisher Scientific) equipped with Waters (Milford, MA)  
382 NanoAcquity HPLC pump Peptides were separated onto a 100  $\mu\text{m}$  inner diameter microcapillary trapping  
383 column packed first with approximately 5 cm of C18 Reprosil resin (5  $\mu\text{m}$ , 100  $\text{\AA}$ , Dr. Maisch GmbH,  
384 Germany) followed by analytical column ~20 cm of Reprosil resin (1.8  $\mu\text{m}$ , 200  $\text{\AA}$ , Dr. Maisch GmbH,  
385 Germany). Separation was achieved through applying a gradient from 5–27% ACN in 0.1% formic acid  
386 over 90 min at 200 nl min<sup>-1</sup>. Electrospray ionization was enabled through applying a voltage of 1.8 kV  
387 using a home-made electrode junction at the end of the microcapillary column and sprayed from fused  
388 silica pico tips (New Objective, MA). The LTQ Orbitrap Elite was operated in data-dependent mode for  
389 the mass spectrometry methods. The mass spectrometry survey scan was performed in the Orbitrap in the  
390 range of 395 –1,800 m/z at a resolution of  $6 \times 10^4$ , followed by the selection of the twenty most intense  
391 ions (TOP20) for CID-MS2 fragmentation in the ion trap using a precursor isolation width window of 2  
392 m/z, AGC setting of 10,000, and a maximum ion accumulation of 200 ms. Singly charged ion species  
393 were not subjected to CID fragmentation. Normalized collision energy was set to 35 V and an activation  
394 time of 10 ms. Ions in a 10 ppm m/z window around ions selected for MS2 were excluded from further  
395 selection for fragmentation for 60 s. The same TOP20 ions were subjected to HCD MS2 event in Orbitrap  
396 part of the instrument. The fragment ion isolation width was set to 0.7 m/z, AGC was set to 50,000, the  
397 maximum ion time was 200 ms, normalized collision energy was set to 27V and an activation time of 1  
398 ms for each HCD MS2 scan.

399 **Mass spectrometry data analysis.** Raw data were submitted for analysis in MaxQuant 1.5.6.5 (13).  
400 Assignment of MS/MS spectra was performed by searching the data against a protein sequence database  
401 including all entries from the *E. coli* MG1655 proteome (51), the *R. palustris* CGA009 proteome (45),  
402 and other known contaminants such as human keratins and common lab contaminants. MaxQuant  
403 searches were performed using a 20 ppm precursor ion tolerance with a requirement that each peptide had  
404 N termini consistent with trypsin protease cleavage, allowing up to two missed cleavage sites. 10-plex  
405 TMT tags on peptide amino termini and lysine residues were set as static modifications while methionine



406 oxidation and deamidation of asparagine and glutamine residues were set as variable modifications. MS2  
407 spectra were assigned with a false discovery rate (FDR) of 1% at the protein level by target-decoy  
408 database search. Per-peptide reporter ion intensities were exported from MaxQuant (evidence.txt). Only  
409 peptides with a parent ion fraction greater than or equal to 0.5 were used for subsequent analysis (6063 of  
410 9987 peptides). Intensities were calculated as the sum of peptide intensities. Ratios between conditions  
411 were computed at the peptide level, and the protein ratio was computed as the mean of peptide ratios. All  
412 ratios were normalized by dividing by the median value for proteins from the same species. Ratio  
413 significance for coculture conditions at an FDR of 1% was computed by determining the ratio  $r$  at which  
414 99% of genes have ratio less than  $r$  when comparing biological replicate monocultures.

415 **Expression of *E. coli amtB* in coculture.** The ASKA collection (52) plasmid harboring an IPTG-  
416 inducible copy of *amtB* (pCA24N *amtB*) was purified from strain JW0441-AM and introduced by  
417 electroporation into WT *E. coli* and *E. coli*  $\Delta$ NtrC. Cocultures were inoculated with either single colonies  
418 of each species or at a 1:1 starting species ratio, as indicated in the figure legends. IPTG and 5  $\mu$ g/ml  
419 chloramphenicol were supplemented to cocultures to induce *E. coli amtB* expression in cocultures and  
420 maintain the plasmid, respectively.

421

## 422 **Acknowledgments**

423 We thank B. A. Budnik and R. A. Robins (Harvard MSPRL) for assistance with mass spectrometry.

424 We thank P. L. Foster for providing the Keio and ASKA *E. coli* collections. This work was supported in  
425 part by the U.S. Department of Energy, Office of Science, Office of Biological and Environmental  
426 Research under Award Number DE-SC0008131 to JBM, by the U.S. Army Research Office, grant  
427 W911NF-14-1-0411 to ML, DAD, and JBM, by a National Institutes of Health National Service Award  
428 F32GM123703 to MGB, and by the Indiana University College of Arts and Sciences.

429

## 430 **References**

431 1. Seth EC, Taga ME. 2014. Nutrient cross-feeding in the microbial world. *Front. Microbiol.* 5:1–6.

- 432 2. Hammer ND, Cassat JE, Noto MJ, Lojek LJ, Chadha AD, Schmitz JE, Creech CB, Skaar EP. 2014.  
433 Inter-and intraspecies metabolite exchange promotes virulence of antibiotic-resistant *Staphylococcus*  
434 *aureus*. *Cell Host Microbe* 16:531–537.
- 435 3. Ramsey MM, Rumbaugh KP, Whiteley M. 2011. Metabolite cross-feeding enhances virulence in a  
436 model polymicrobial infection. *PLoS Pathog.* 7:1–8.
- 437 4. Iannotti EL, Kafkewit D, Wolin MJ, Bryant MP. 1973. Glucose fermentation products of  
438 *Ruminococcus albus* grown in continuous culture with *Vibrio succinogenes* - Changes caused by  
439 interspecies transfer of H<sub>2</sub>. *J. Bacteriol.* 114:1231–1240.
- 440 5. Stolyar S, Van Dien S, Hillesland KL, Pinel N, Lie TJ, Leigh JA, Stahl DA. 2007. Metabolic modeling  
441 of a mutualistic microbial community. *Mol. Syst. Biol.* 3:92.
- 442 6. Walker CB, Redding-Johanson AM, Baidoo EE, Rajeev L, He Z, Hendrickson EL, Joachimiak MP,  
443 Stolyar S, Arkin AP, Leigh JA, Zhou J, Keasling JD, Mukhopadhyay A, Stahl DA. 2012. Functional  
444 responses of methanogenic archaea to syntrophic growth. *ISME J.* 6:2045–2055.
- 445 7. Summers ZM, Fogarty HE, Leang C, Franks AE, Malvankar NS, Lovley DR. 2010. Direct exchange of  
446 electrons within aggregates of an evolved syntrophic coculture of anaerobic bacteria. *Science*  
447 330:1413–5.
- 448 8. Widder S, Allen RJ, Pfeiffer T, Curtis TP, Wiuf C, Sloan WT, Cordero OX, Brown SP, Momeni B,  
449 Shou W, Kettle H, Flint HJ, Haas AF, Laroche B, Kreft J. 2016. Challenges in microbial ecology:  
450 building predictive understanding of community function and dynamics. *ISME J.* 10:2557–2568.
- 451 9. Lindemann SR, Bernstein HC, Song H-S, Fredrickson JK, Fields MW, Shou W, Johnson DR, Beliaev  
452 AS. 2016. Engineering microbial consortia for controllable outputs. *ISME J.* 10:2077–2084.
- 453 10. LaSarre B, McCully AL, Lennon JT, McKinlay JB. 2017. Microbial mutualism dynamics governed by  
454 dose-dependent toxicity of cross-fed nutrients. *ISME J.* 11:337–348.
- 455 11. McCully AL, LaSarre B, McKinlay JB. 2017. Growth-independent cross-feeding modifies boundaries  
456 for coexistence in a bacterial mutualism. *Environ. Microbiol.* 19:3538–3550.
- 457 12. McCully AL, LaSarre B, McKinlay JB. 2017. Recipient-biased competition for an intracellularly  
458 generated cross-fed nutrient is required for coexistence of microbial mutualists. *mBio* 8:e01620-17.

- 459 13. Cox J, Mann M. 2008. MaxQuant enables high peptide identification rates, individualized p.p.b.-range  
460 mass accuracies and proteome-wide protein quantification. *Nat. Biotechnol.* 26:1367–1372.
- 461 14. Jozefczuk S, Klie S, Catchpole G, Szymanski J, Cuadros-Inostroza A, Steinhauser D, Selbig J,  
462 Willmitzer L. 2010. Metabolomic and transcriptomic stress response of *Escherichia coli*. *Mol. Syst.*  
463 *Biol.* 6:1–16.
- 464 15. Lessard IAD, Pratt SD, McCafferty DG, Bussiere DE, Hutchins C, Wanner BL, Katz L, Walsh CT.  
465 1998. Homologs of the vancomycin resistance D-Ala-D-Ala dipeptidase VanX in *Streptomyces*  
466 *toyocaensis*, *Escherichia coli* and *Synechocystis* □: attributes of catalytic efficiency, stereoselectivity  
467 and regulation with implications for function. *Chem. Biol.* 5:489-504.
- 468 16. Kim KS, Pelton JG, Inwood WB, Andersen U, Kustu S, Wemmer DE. 2010. The Rut pathway for  
469 pyrimidine degradation: Novel chemistry and toxicity problems. *J. Bacteriol.* 192:4089–4102.
- 470 17. Caldara M, Charlier D, Cunin R. 2006. The arginine regulon of *Escherichia coli*: Whole-system  
471 transcriptome analysis discovers new genes and provides an integrated view of arginine regulation.  
472 *Microbiology* 152:3343–3354.
- 473 18. Kashiwagi K, Pistocchi R, Shibuya S, Sugiyama S, Morikawa K, Igarashi K. 1996. Spermidine-  
474 preferential uptake system in *Escherichia coli*. *J. Biol. Chem.* 271:12205–12208.
- 475 19. van Heeswijk WC, Westerhoff H V., Boogerd FC. 2013. Nitrogen assimilation in *Escherichia coli*:  
476 Putting molecular data into a systems perspective. *Microbiol. Mol. Biol. Rev.* 77:628–695.
- 477 20. Zimmer DP, Soupene E, Lee HL, Wendisch VF, Khodursky AB, Peter BJ, Bender RA, Kustu S. 2000.  
478 Nitrogen regulatory protein C-controlled genes of *Escherichia coli*: scavenging as a defense against  
479 nitrogen limitation. *Proc. Natl. Acad. Sci. U. S. A.* 97:14674–14679.
- 480 21. Barney BM, Eberhart LJ, Ohlert JM, Knutson CM, Plunkett MH. 2015. Gene deletions resulting in  
481 increased nitrogen release by *Azotobacter vinelandii*: Application of a novel nitrogen biosensor. *Appl.*  
482 *Environ. Microbiol.* 81:4316–4328.
- 483 22. Kim M, Zhang Z, Okano H, Yan D, Groisman A, Hwa T. 2012. Need-based activation of ammonium  
484 uptake in *Escherichia coli*. *Mol. Syst. Biol.* 8:1–10.
- 485 23. Figueira R, Brown DR, Ferreira D, Eldridge MJG, Burchell L, Pan Z, Helaine S, Wigneshweraraj S.

- 486 2015. Adaptation to sustained nitrogen starvation by *Escherichia coli* requires the eukaryote-like  
487 serine/threonine kinase YeaG. *Sci. Rep.* 5:1–14.
- 488 24. Rosenthal AZ, Matson EG, Eldar A, Leadbetter JR. 2011. RNA-seq reveals cooperative metabolic  
489 interactions between two termite-gut spirochete species in co-culture. *ISME J.* 5:1133–1142.
- 490 25. Filkins LM, Graber JA., Olson DG, Dolben EL, Lynd LR, Bhujju S, Toole AO, O’Toole GA. 2015.  
491 Coculture of *Staphylococcus aureus* with *Pseudomonas aeruginosa* drives *S. aureus* towards  
492 fermentative metabolism and reduced viability in a cystic fibrosis model. *J. Bacteriol.* 197:2252-2264.
- 493 26. Men Y, Feil H, VerBerkmoes NC, Shah MB, Johnson DR, Lee PKH, West KA, Zinder SH, Andersen  
494 GL, Alvarez-Cohen L. 2012. Sustainable syntrophic growth of *Dehalococcoides ethenogenes* strain  
495 195 with *Desulfovibrio vulgaris* Hildenborough and *Methanobacterium congolense*: global  
496 transcriptomic and proteomic analyses. *ISME J.* 6:410–421.
- 497 27. Giannone RJ, Huber H, Karpinets T, Heimerl T, Küper U, Rachel R, Keller M, Hettich RL, Podar M.  
498 2011. Proteomic characterization of cellular and molecular processes that enable the *Nanoarchaeum*  
499 *equitans*-*Ignicoccus hospitalis* relationship. *PLoS One* 6:e22942.
- 500 28. Hillesland KL, Lim S, Flowers JJ, Turkarslan S, Pinel N, Zane GM, Elliott N, Qin Y, Wu L, Baliga  
501 NS, Zhou J, Wall JD, Stahl DA. 2014. Erosion of functional independence early in the evolution of a  
502 microbial mutualism. *Proc. Natl. Acad. Sci.* 111:14822–14827.
- 503 29. Song HS, Renslow RS, Fredrickson JK, Lindemann SR. 2015. Integrating ecological and engineering  
504 concepts of resilience in microbial communities. *Front. Microbiol.* 6:1–7.
- 505 30. Turkarslan S, Raman A V, Thompson AW, Arens CE, Gillespie MA, von Netzer F, Hillesland KL,  
506 Stolyar S, López García de Lomana A, Reiss DJ, Gorman - Lewis D, Zane GM, Ranish JA, Wall JD,  
507 Stahl DA, Baliga NS. 2017. Mechanism for microbial population collapse in a fluctuating resource  
508 environment. *Mol. Syst. Biol.* 13:919.
- 509 31. Thompson AW, Turkarslan S, Arens CE, López García de Lomana A, Raman A V., Stahl DA, Baliga  
510 NS. 2017. Robustness of a model microbial community emerges from population structure among  
511 single cells of a clonal population. *Environ. Microbiol.* 19:3059–3069.
- 512 32. Kjelleberg S, Albertson N, Flardh K, Holmquist L, Jouper-Jaan A, Marouga R, Ostling J, Svenblad B,

- 513 Weichart D. 1993. How do non-differentiating bacteria adapt to starvation? *Antonie Van Leeuwenhoek*  
514 63:333–341.
- 515 33. Shimizu K. 2013. Regulation systems of bacteria such as *Escherichia coli* in response to nutrient  
516 limitation and environmental stresses. *Metabolites* 4:1–35.
- 517 34. Barbara S, Resources N, Collins F. 2007. Microbial stress-response physiology and its implications  
518 88:1386–1394.
- 519 35. Roszak DB, Colwell RR. 1987. Survival strategies of bacteria in the natural environment. *Microbiol.*  
520 *Rev.* 51:365–379.
- 521 36. Jørgensen BB, Marshall IPG. 2016. Slow microbial life in the seabed. *Ann. Rev. Mar. Sci.* 8:311–332.
- 522 37. Bergkessel M, Basta DW, Newman DK. 2016. The physiology of growth arrest: uniting molecular and  
523 environmental microbiology. *Nat. Rev. Microbiol.* 14:549–562.
- 524 38. Lennon JT, Jones SE. 2011. Microbial seed banks: The ecological and evolutionary implications of  
525 dormancy. *Nat. Rev. Microbiol.* 9:119–130.
- 526 39. Wanner U, Egli T. 1990. Dynamics of microbial growth and cell composition in batch culture. *FEMS*  
527 *Microbiol. Rev.* 6:19–43.
- 528 40. Fritts RK, LaSarre B, Stoner AM, Posto AL, McKinlay JB. 2017. A *Rhizobiales*-specific unipolar  
529 polysaccharide adhesin contributes to *Rhodopseudomonas palustris* biofilm formation across diverse  
530 photoheterotrophic conditions. *Appl. Environ. Microbiol.* 83: e03035-16.
- 531 41. Kim M-K, Harwood CS. 1991. Regulation of benzoate-CoA ligase in *Rhodopseudomonas palustris*.  
532 *FEMS Microbiol. Lett.* 83:199–203.
- 533 42. Thomason LC, Costantino N, Court DL. 2007. *E. coli* genome manipulation by P1 transduction. *Curr.*  
534 *Protoc. Mol. Biol.* 1.17.1-1.17.8.
- 535 43. McKinlay JB, Zeikus JG, Vieille C. 2005. Insights into *Actinobacillus succinogenes* fermentative  
536 metabolism in a chemically defined growth medium. *Appl Env. Microbiol* 71:6651–6656.
- 537 44. Hayashi K, Morooka N, Yamamoto Y, Fujita K, Isono K, Choi S, Ohtsubo E, Baba T, Wanner BL,  
538 Mori H, Horiuchi T. 2006. Highly accurate genome sequences of *Escherichia coli* K-12 strains  
539 MG1655 and W3110. *Mol. Syst. Biol.* 2:2006.0007.

- 540 45. Larimer FW, Chain P, Hauser L, Lamerdin J, Malfatti S, Do L, Land ML, Pelletier D a, Beatty JT,  
541 Lang AS, Tabita FR, Gibson JL, Hanson TE, Bobst C, Torres JLTY, Peres C, Harrison FH, Gibson J,  
542 Harwood CS. 2004. Complete genome sequence of the metabolically versatile photosynthetic  
543 bacterium *Rhodospseudomonas palustris*. Nat. Biotechnol. 22:55–61.
- 544 46. Trapnell C, Roberts A, Goff L, Pertea G, Kim D, Kelley DR, Pimentel H, Salzberg SL, Rinn JL,  
545 Pachter L. 2012. Differential gene and transcript expression analysis of RNA-seq experiments with  
546 TopHat and Cufflinks. Nat. Protoc. 7:562–578.
- 547 47. Kim D, Pertea G, Trapnell C, Pimentel H, Kelley R, Salzberg SL. 2013. TopHat2: accurate alignment  
548 of transcriptomes in the presence of insertions, deletions and gene fusions. Genome Biol. 14:R36.
- 549 48. Langmead B, Salzberg SL. 2012. Fast gapped-read alignment with Bowtie 2. Nat. Methods 9:357–9.
- 550 49. Trapnell C, Williams BA, Pertea G, Mortazavi A, Kwan G, van Baren MJ, Salzberg SL, Wold BJ,  
551 Pachter L. 2010. Transcript assembly and quantification by RNA-Seq reveals unannotated transcripts  
552 and isoform switching during cell differentiation. Nat. Biotechnol. 28:511–515.
- 553 50. Wallace EWJ, Kear-Scott JL, Pilipenko EV., Schwartz MH, Laskowski PR, Rojek AE, Katanski CD,  
554 Riback JA, Dion MF, Franks AM, Airoidi EM, Pan T, Budnik BA, Drummond DA. 2015. Reversible,  
555 specific, active aggregates of endogenous proteins assemble upon heat stress. Cell 162:1286–1298.
- 556 51. The UniProt Consortium. 2017. UniProt: The universal protein knowledgebase. Nucleic Acids Res.  
557 45:D158–D169.
- 558 52. Kitagawa M, Ara T, Arifuzzaman M, Ioka-Nakamichi T, Inamoto E, Toyonaga H, Mori H. 2005.  
559 Complete set of ORF clones of *Escherichia coli* ASKA library (A complete set of *E. coli* K-12 ORF  
560 archive): unique resources for biological research. DNA Res. 12:291–299.
- 561 53. Blattner F, Plunkett G I, Bloch C, Perna N, Burland V, Riley M, Collado-Vides J, Glasner J, Rode C,  
562 Mayhew G, Gregor J, Davis N, Kirkpatrick H, Goeden M, Rose D, Mau B, Shao Y. 1997. The  
563 complete genome sequence of *Escherichia coli* K-12. Science. 277:1453–1462.
- 564 54. Baba T, Ara T, Hasegawa M, Takai Y, Okumura Y, Baba M, Datsenko KA, Tomita M, Wanner BL,  
565 Mori H. 2006. Construction of *Escherichia coli* K-12 in-frame, single-gene knockout mutants: the Keio  
566 collection. Mol. Syst. Biol. 2:2006.0008.

567 **Figure Legends**568 **Table 1. Selected differentially expressed transcripts in cocultures of *E. coli* and *R. palustris* compared to monocultures**

| Species        | Gene symbol        | Gene description                               | <i>Rp</i> Nx + <i>Ec</i> WT |                      | <i>Rp</i> NxΔAmtB + <i>Ec</i> WT |                      | <i>Rp</i> ΔAmtB + <i>Ec</i> WT |                      |
|----------------|--------------------|------------------------------------------------|-----------------------------|----------------------|----------------------------------|----------------------|--------------------------------|----------------------|
|                |                    |                                                | Fold change <sup>c</sup>    | FDR adjusted P-value | Fold change                      | FDR adjusted P-value | Fold change                    | FDR adjusted P-value |
| <i>E. coli</i> | rutA <sup>b</sup>  | Pyrimidine monooxygenase                       | 114.5 ± 0.0                 | 0.09                 | 108.0 ± 0.0                      | 0.09                 | 118.0 ± 0.1                    | 0.09                 |
|                | rutC <sup>b</sup>  | Aminoacrylate peracid reductase                | 60.7 ± 0.1                  | 0.01                 | 58.0 ± 0.1                       | 0.01                 | 60.9 ± 0.1                     | 0.01                 |
|                | ddpX <sup>ab</sup> | D-ala dipeptidase                              | 58.3 ± 0.1                  | 0.01                 | 59.9 ± 0.1                       | 0.01                 | 50.1 ± 0.0                     | 0.01                 |
|                | rutD <sup>b</sup>  | Aminoacrylate hydrolase                        | 56.9 ± 0.0                  | 0.01                 | 52.9 ± 0.1                       | 0.01                 | 56.6 ± 0.1                     | 0.01                 |
|                | rutE <sup>b</sup>  | Malonic semialdehyde                           | 48.8 ± 0.1                  | 0.01                 | 44.4 ± 0.1                       | 0.01                 | 48.2 ± 0.1                     | 0.01                 |
|                | rutF <sup>b</sup>  | FMN reductase                                  | 45.2 ± 0.1                  | 0.01                 | 40.3 ± 0.1                       | 0.01                 | 45.5 ± 0.1                     | 0.01                 |
|                | patA <sup>ab</sup> | Putrescine aminotransferase                    | 36.3 ± 0.1                  | 0.01                 | 33.6 ± 0.1                       | 0.01                 | 34.4 ± 0.0                     | 0.01                 |
|                | argT <sup>ab</sup> | Lysine/arginine/ornithine binding protein      | 35.1 ± 0.3                  | 0.01                 | 38.9 ± 0.3                       | 0.01                 | 35.3 ± 0.3                     | 0.01                 |
|                | rutG <sup>b</sup>  | FMN reductase                                  | 28.5 ± 0.0                  | 0.01                 | 26.9 ± 0.0                       | 0.01                 | 29.0 ± 0.1                     | 0.01                 |
|                | ddpA <sup>ab</sup> | Probably dipeptide binding periplasmid protein | 23.7 ± 0.0                  | 0.01                 | 26.8 ± 0.0                       | 0.01                 | 21.0 ± 0.0                     | 0.01                 |
|                | amtB <sup>ab</sup> | Ammonium transporter                           | 21.3 ± 0.2                  | 0.02                 | 25.0 ± 0.2                       | 0.01                 | 24.1 ± 0.2                     | 0.01                 |
|                | yeaG <sup>b</sup>  | Eukaryotic-like serine/threonine kinase        | 13.6 ± 0.0                  | 0.08                 | 15.2 ± 0.0                       | 0.04                 | 14.5 ± 0.1                     | 0.06                 |
|                | yeaH <sup>b</sup>  | Unknown                                        | 12.8 ± 0.0                  | 0.06                 | 14.2 ± 0.1                       | 0.05                 | 14.0 ± 0.1                     | 0.06                 |
|                | metE               | Methionine biosynthesis                        | -16.2 ± 0.1                 | 0.03                 | 23.6 ± 0.6                       | 0.03                 | 22.8 ± 0.5                     | 0.02                 |
|                | fimF               | Fimbriae regulatory protein                    | -16.3 ± 0.0                 | 0.01                 | 18.4 ± 0.0                       | 0.01                 | 20.3 ± 0.1                     | 0.01                 |
|                | tar                | Methyl-accepting chemotaxis protein II         | -16.3 ± 0.2                 | 0.01                 | 15.8 ± 0.2                       | 0.02                 | 15.4 ± 0.2                     | 0.01                 |
|                | purL <sup>a</sup>  | Purine biosynthesis                            | -16.8 ± 0.0                 | 0.03                 | 20.4 ± 0.1                       | 0.02                 | 18.8 ± 0.0                     | 0.02                 |
|                | flgD               | Flagellar basal body rod modification protein  | -17.1 ± 0.1                 | 0.02                 | 16.9 ± 0.0                       | 0.01                 | 17.4 ± 0.1                     | 0.01                 |
|                | ilvL <sup>a</sup>  | Isoleucine biosynthesis                        | -17.4 ± 0.7                 | 0.02                 | 14.9 ± 0.4                       | 0.02                 | 14.2 ± 0.5                     | 0.02                 |
|                | pgaB               | Glucosamine deacetylase                        | -17.9 ± 0.0                 | 0.02                 | 18.8 ± 0.0                       | 0.03                 | 17.3 ± 0.0                     | 0.04                 |
|                | ilvC <sup>a</sup>  | Isoleucine biosynthesis                        | -18.0 ± 0.2                 | 0.03                 | 17.1 ± 0.2                       | 0.04                 | 17.6 ± 0.2                     | 0.03                 |
|                | metK               | Methionine biosynthesis                        | -19.2 ± 0.1                 | 0.03                 | 17.5 ± 0.1                       | 0.03                 | 17.4 ± 0.1                     | 0.04                 |
|                | tap                | Methyl-accepting chemotaxis protein IV         | -19.7 ± 0.3                 | 0.01                 | 22.0 ± 0.2                       | 0.01                 | 22.1 ± 0.2                     | 0.01                 |
|                | flgC               | Flagellar basal body                           | -20.1 ± 0.1                 | 0.05                 |                                  |                      | 21.02 ± 0.05                   |                      |
|                | purK <sup>a</sup>  | Purine biosynthesis                            | -20.7 ± 0.1                 | 0.03                 | 25.1 ± 0.1                       | 0.01                 | 20.8 ± 0.2                     | 0.03                 |
|                | metA               | Methionine biosynthesis                        | -21.0 ± 0.1                 | 0.02                 | 20.6 ± 0.1                       | 0.02                 | 22.14 ± 0.07                   | 0.02                 |
|                | ilvG <sup>a</sup>  | Isoleucine biosynthesis                        | -22.1 ± 0.1                 | 0.01                 | 19.3 ± 0.1                       | 0.03                 | 0.07                           | 0.01                 |

|                     |                      |                                               |             |      |            |      |              |      |
|---------------------|----------------------|-----------------------------------------------|-------------|------|------------|------|--------------|------|
|                     | metF                 | Methionine biosynthesis                       | -23.3 ± 0.1 | 0.01 | 22.5 ± 0.1 | 0.01 | 17.62 ± 0.38 | 0.03 |
|                     | nadB                 | Aspartate oxidase                             | -24.3 ± 0.0 | 0.08 | 29.1 ± 0.1 | 0.05 | 23.74 ± 0.01 | 0.07 |
| <i>R. palustris</i> | RPA1206 <sup>a</sup> | Aldehyde dehydrogenase                        | 36.0 ± 0.9  | 0.02 |            |      | 62.4 ± 0.4   | 0.01 |
|                     | RPA1205 <sup>a</sup> | Putative alcohol dehydrogenase                | 32.8 ± 0.5  | 0.02 |            |      | 28.6 ± 0.4   | 0.01 |
|                     | RPA0538              | Putative porin                                | 31.6 ± 2.3  | 0.03 |            |      |              |      |
|                     | RPA1009 <sup>a</sup> | Possible cytochrome P450                      | 10.4 ± 0.8  | 0.03 |            |      |              |      |
|                     | RPA3101 <sup>a</sup> | Unknown                                       | 9.4 ± 0.3   | 0.03 |            |      | 10.3 ± 0.3   | 0.04 |
|                     | RPA4045 <sup>a</sup> | Putative aa ABC transport                     | 8.8 ± 0.4   | 0.02 |            |      |              |      |
|                     | RPA3100              | Unknown                                       | 7.8 ± 0.2   | 0.02 |            |      |              |      |
|                     | RPA1010              | Beta-lactamase-like                           | 7.7 ± 0.4   | 0.04 |            |      |              |      |
|                     | RPA4020 <sup>a</sup> | Putative aa ABC transport permease            | 7.7 ± 0.2   | 0.02 |            |      |              |      |
|                     | RPA1204              | Unknown                                       | 7.4 ± 0.1   | 0.02 |            |      | 7.4 ± 0.1    | 0.03 |
|                     | RPA2376              | Unknown                                       | -6.9 ± 0.1  | 0.04 | 15.4 ± 0.2 | 0.04 | 9.0 ± 0.2    | 0.03 |
|                     | RPA2142              | Putative fatty acid CoA ligase                | -7.3 ± 0.1  | 0.03 |            |      |              |      |
|                     | RPA2377              | Unknown                                       | -8.4 ± 0.2  | 0.02 | 16.4 ± 0.6 | 0.05 | 7.3 ± 0.1    | 0.02 |
|                     | RPA2379              | Probable acetyltransferase                    | -8.5 ± 0.3  | 0.02 |            |      |              |      |
|                     | RPA2390              | Possible Rhizobactin siderophore biosynthesis | -9.6 ± 0.2  | 0.06 | 22.8 ± 0.2 | 0.05 | 16.8 ± 0.5   | 0.03 |
|                     | RPA1260 <sup>a</sup> | Universal stress protein                      | -10.5 ± 0.0 | 0.02 |            |      | 7.2 ± 0.0    | 0.07 |
|                     | RPA2380              | Possible tonB dep iron siderophore            | -11.4 ± 0.6 | 0.03 | 17.1 ± 0.1 | 0.06 | 18.4 ± 0.2   | 0.01 |
|                     | RPA1259              | Putative cation-transporting P-type ATPase    | -11.6 ± 0.4 | 0.02 |            |      | 10.6 ± 0.0   | 0.06 |
|                     | RPA2378 <sup>a</sup> | Putative TonB-dep receptor                    | -13.1 ± 0.1 | 0.03 | 24.1 ± 0.3 | 0.06 | 17.5 ± 0.3   | 0.02 |

569

570 Genes shown in table were directly or indirectly mentioned in the text. For a full list of differentially-expressed genes, see Supplementary Data.

571 <sup>a</sup> Genes were also identified as differentially expressed proteins in coculture (Table 2).

572 <sup>b</sup> Gene is transcriptionally activated by *E. coli* NtrC during nitrogen limitation.

573 <sup>c</sup> Fold-change values represent mean ± SD. Positive values indicate gene was upregulated in coculture. Negative values indicate gene was

574 downregulated in coculture. Initial cutoff was set to a log<sub>2</sub> value of 2 in at least 2 of 3 biological replicates. For a complete list of all differentially

575 regulated transcripts, refer to supplementary data. Differential expression was determined with the Cufflinks tool cuffdiff (v.2.2.0) (46)



576 **Table 2. Selected differentially expressed proteins in cocultures of *E. coli* and *R. palustris* compared to monocultures**

| Species             | Gene Symbol               | Gene Description                                             | Rp Nx<br>+ Ec WT                                         | Rp NxΔAmtB<br>+ Ec WT                                    | Rp ΔAmtB<br>+ Ec WT                                      |
|---------------------|---------------------------|--------------------------------------------------------------|----------------------------------------------------------|----------------------------------------------------------|----------------------------------------------------------|
|                     |                           |                                                              | Normalized<br>Relative Protein<br>Intensity <sup>c</sup> | Normalized<br>Relative Protein<br>Intensity <sup>d</sup> | Normalized<br>Relative Protein<br>Intensity <sup>d</sup> |
| <i>E. coli</i>      | argT <sup>ab</sup>        | Lysine/arginine/ornithine binding protein                    | 10.9                                                     | 11.1                                                     | 10.3                                                     |
|                     | ddpA <sup>ab</sup>        | D-ala dipeptide permease                                     | 5.8                                                      | 7.2                                                      | 6.8                                                      |
|                     | gss                       | Bifunctional glutathionylspermidine synthetase/amidase       | 4.5                                                      | 4.7                                                      | 4.0                                                      |
|                     | tktB                      | Transketolase                                                | 4.1                                                      | 5.5                                                      | 3.8                                                      |
|                     | potF <sup>ab</sup>        | Putrescine-binding periplasmic protein                       | 3.8                                                      | 4.2                                                      | 4.1                                                      |
|                     | modA                      | Molybdate-binding periplasmic protein                        | 3.8                                                      | 4.0                                                      | 4.9                                                      |
|                     | gabD <sup>ab</sup>        | Succinate-semialdehyde dehydrogenase                         | 3.7                                                      | 4.8                                                      | 3.5                                                      |
|                     | dapB                      | 4-hydroxy-tetrahydrodipicolinate reductase                   | 3.6                                                      | 2.8                                                      | 2.7                                                      |
|                     | talA                      | Transaldolase A                                              | 3.6                                                      | 4.2                                                      | 4.4                                                      |
|                     | amtB <sup>ab</sup>        | NH <sub>4</sub> <sup>+</sup> Transporter                     | 3.5                                                      | 3.5                                                      | 3.5                                                      |
|                     | asnS                      | Asparagine biosynthesis                                      | -2.1                                                     | -1.9                                                     | -1.9                                                     |
|                     | serA                      | Serine biosynthesis                                          | -2.1                                                     | -2.5                                                     | -2.3                                                     |
|                     | secE                      | Protein translocase subunit                                  | -2.1                                                     | -1.8                                                     | -2.3                                                     |
|                     | glf                       | LPS biosynthesis                                             | -2.1                                                     | -1.9                                                     | -1.9                                                     |
|                     | yjiM                      | Putative dehydratase                                         | -2.2                                                     | -1.9                                                     | -1.8                                                     |
|                     | sstT                      | Serine/threonine transporter                                 | -2.2                                                     | -2.4                                                     | -2.4                                                     |
|                     | rmlA1                     | Carbohydrate biosynthesis                                    | -2.3                                                     | -2.1                                                     | -2.4                                                     |
|                     | ompF                      | Outer membrane protein                                       | -2.3                                                     | -2.3                                                     | -2.6                                                     |
|                     | ribE                      | Riboflavin biosynthesis                                      | -2.3                                                     | -1.7                                                     | -1.9                                                     |
|                     | secY                      | Protein translocase subunit                                  | -2.6                                                     | -2.0                                                     | -2.0                                                     |
| glyA                | Glycine biosynthesis      | -3.2                                                         | -3.0                                                     | -3.4                                                     |                                                          |
| purE <sup>a</sup>   | Purine biosynthesis       | -3.3                                                         | -3.6                                                     | -3.5                                                     |                                                          |
| yqjI                | Transcriptional regulator | -3.6                                                         | -3.0                                                     | -3.4                                                     |                                                          |
| asnA                | Aspartate-ammonia ligase  | -6.4                                                         | -3.8                                                     | -3.7                                                     |                                                          |
| <i>R. palustris</i> | RPA1206 <sup>a</sup>      | Aldehyde dehydrogenase                                       | 10.0                                                     |                                                          | 3.3                                                      |
|                     | RPA1205 <sup>a</sup>      | Putative alcohol dehydrogenase                               | 7.8                                                      | 1.2                                                      | 3.9                                                      |
|                     | RPA3101 <sup>a</sup>      | Unknown                                                      | 7.1                                                      | 1.5                                                      | 2.6                                                      |
|                     | RPA3093                   | ABC transporter urea/short-chain binding protein             | 4.8                                                      | 1.6                                                      | 3.4                                                      |
|                     | RPA3297                   | ABC transporter urea/short-chain binding protein             | 4.7                                                      | 1.5                                                      | 3.2                                                      |
|                     | RPA4019                   | Putative aa ABC transporter system substrate-binding protein | 3.9                                                      | 1.4                                                      | 2.5                                                      |
|                     | RPA4045 <sup>a</sup>      | Putative aa ABC transport                                    | 3.3                                                      | 1.4                                                      | 2.1                                                      |
|                     | RPA1009 <sup>a</sup>      | Possible cytochrome P450                                     | 3.2                                                      | 1.3                                                      | 2.1                                                      |
|                     | RPA1748                   | Putative branched-chain amino acid transport system          | -2.1                                                     | -1.4                                                     | -2.5                                                     |

|                      |                                                             |      |      |      |
|----------------------|-------------------------------------------------------------|------|------|------|
|                      | substrate-binding protein                                   |      |      |      |
| RPA2378 <sup>a</sup> | Putative tonB-dependent receptor protein                    | -2.1 | -1.2 | -1.1 |
| RPA2124              | TonB dependent iron siderophore receptor                    | -2.3 | -1.5 | -1.7 |
| RPA1260 <sup>a</sup> | Universal stress protein                                    | -2.5 | -1.5 | -1.8 |
| RPA2050              | Unknown                                                     | -2.7 | -1.6 | -2.6 |
|                      | Putative ABC transporter periplasmic solute-binding protein |      |      |      |
| RPA3669              | precursor                                                   | -2.8 | -1.1 | -1.3 |
| RPA2120              | Periplasmic binding protein                                 | -6.0 | -1.6 | -1.7 |

577

578 Proteins shown in table were directly or indirectly mentioned in the text. For a full list of differentially-expressed proteins, see Supplementary

579 Data.

580 <sup>a</sup> Genes were also identified as differentially expressed transcripts in coculture (Table 1)

581 <sup>b</sup> Gene is transcriptionally activated by *E. coli* NtrC

582 Values represent mean normalized relative protein intensity for either two<sup>c</sup> or one<sup>d</sup> biological replicate. Positive values indicate gene was

583 upregulated in coculture. Negative values indicate gene was downregulated in coculture.

584

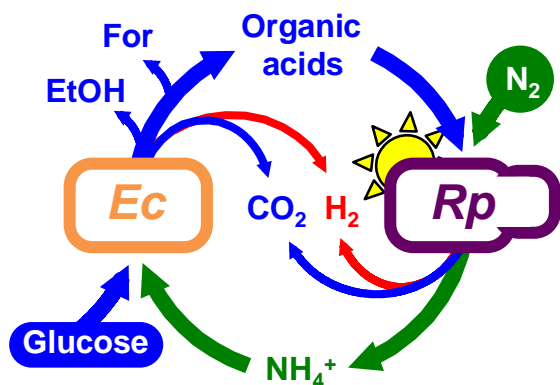

585

586 **FIG 1. Bidirectional cross-feeding of carbon and nitrogen in an anaerobic bacterial mutualism**  
587 **between fermentative *Escherichia coli* (*Ec*) and phototrophic *Rhodospseudomonas palustris* (*Rp*).** *E.*  
588 *coli* anaerobically ferments glucose into excreted organic acids that *R. palustris* Nx consumes (acetate,  
589 lactate and succinate) and other products that *R. palustris* Nx does not consume (formate (For) and  
590 ethanol (EtOH)). In return, *R. palustris* Nx constitutively fixes N<sub>2</sub> gas and excretes NH<sub>4</sub><sup>+</sup>, supplying *E.*  
591 *coli* with essential nitrogen. *R. palustris* Nx grows photoheterotrophically wherein organic compounds are  
592 used for carbon and electrons, and light is used for energy.

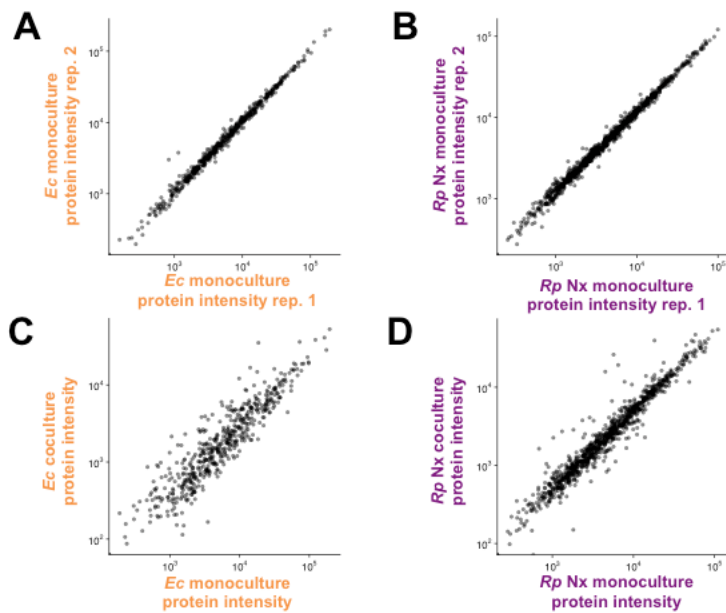

593

594 **FIG 2. Coculture conditions result in altered protein expression patterns in both species, with more**

595 **differences in WT *E. coli* compared to *R. palustris* Nx.** Protein expression (estimated by LC-

596 MS/MS intensity) of wild-type *E. coli* (left, **A,C**) and *R. palustris* Nx (right, **B, D**) comparing

597 protein expression patterns between monoculture biological replicates (rep. 1 versus rep. 2, **A, B**)

598 and monoculture (average over monoculture replicates) versus coculture (**C, D**).

599  
600

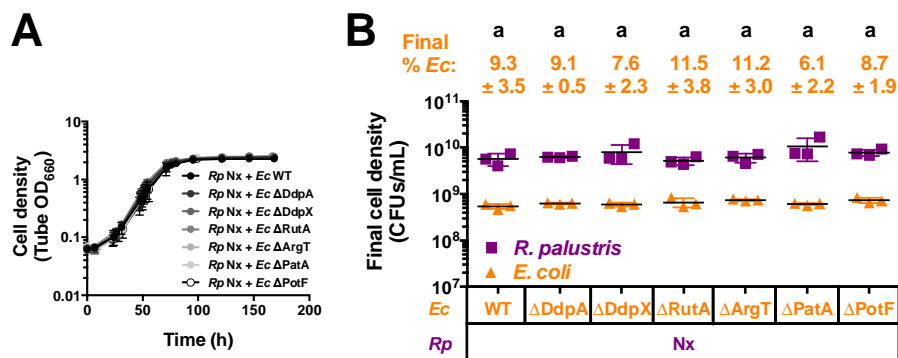

601

602 **FIG 3. Single deletions of upregulated *E. coli* genes do not impair mutualistic growth with *R.***

603 *palustris* Nx. Growth curves (A) and final cell densities (B) from cocultures pairing *E. coli* (*Ec*) mutants

604 with deletions in highly upregulated genes with *R. palustris* (*Rp*) Nx. Final cell densities (B) were taken at

605 the final time point in (A). Cocultures were started with a 1% inoculum of stationary starter cocultures

606 grown from single colonies. Error bars indicate SD, n=3. Different letters indicate statistical differences, p

607 < 0.05, determined by one-way ANOVA with Tukey's multiple comparisons posttest.

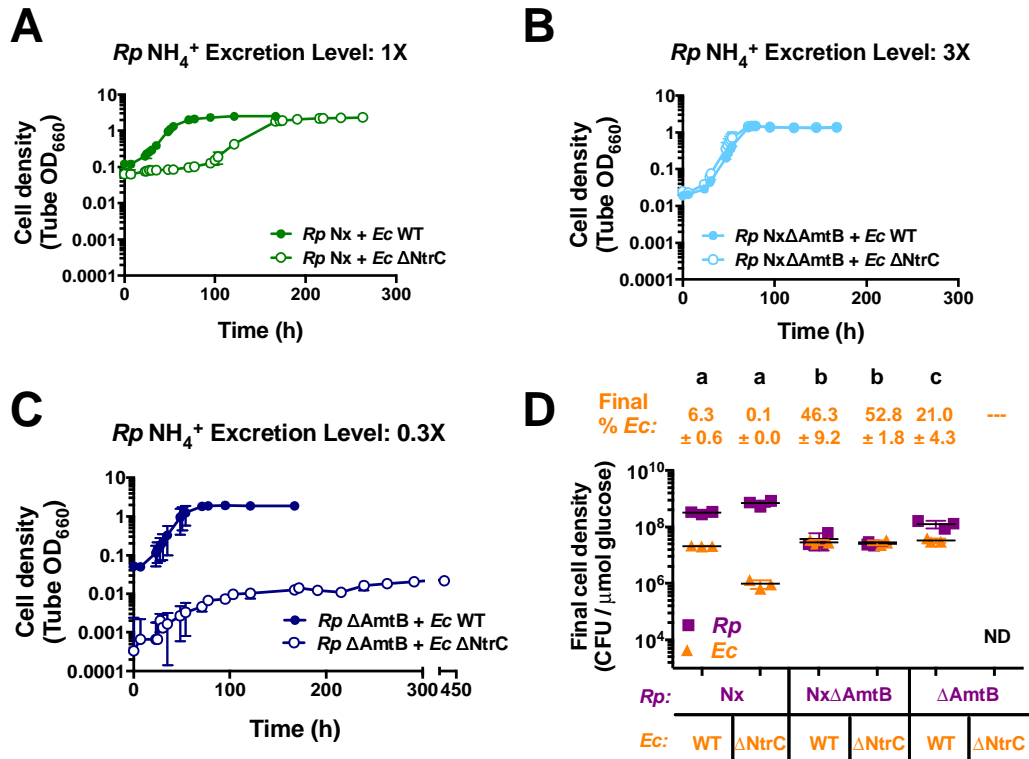

608

609 **FIG 4. *R. palustris* NH<sub>4</sub><sup>+</sup> excretion level affects growth and population trends in cocultures with *E.***

610 *coli* NtrC. Growth curves (A, B, C) and final cell densities normalized to glucose consumption (D) from

611 cocultures pairing WT *E. coli* (*Ec*) (filled circles) or ΔNtrC (open circles) with *R. palustris* (*Rp*) strains

612 with different NH<sub>4</sub><sup>+</sup> excretion levels. Final cell densities (D) were taken at the final time point in the

613 respective growth curve (A, B, C), except for cocultures pairing *R. palustris* ΔAmtB with *E. coli* ΔNtrC

614 which were sampled at 260 h. Cell densities were normalized to glucose consumed to account for

615 incomplete glucose consumption in cocultures containing *E. coli* ΔNtrC. Cocultures were started with a

616 1% inoculum of stationary starter cocultures grown from single colonies. Error bars indicate SD, n=3.

617 Different letters indicate statistical differences, p < 0.05, determined by one-way ANOVA with Tukey's

618 multiple comparisons posttest. ND, not determined.

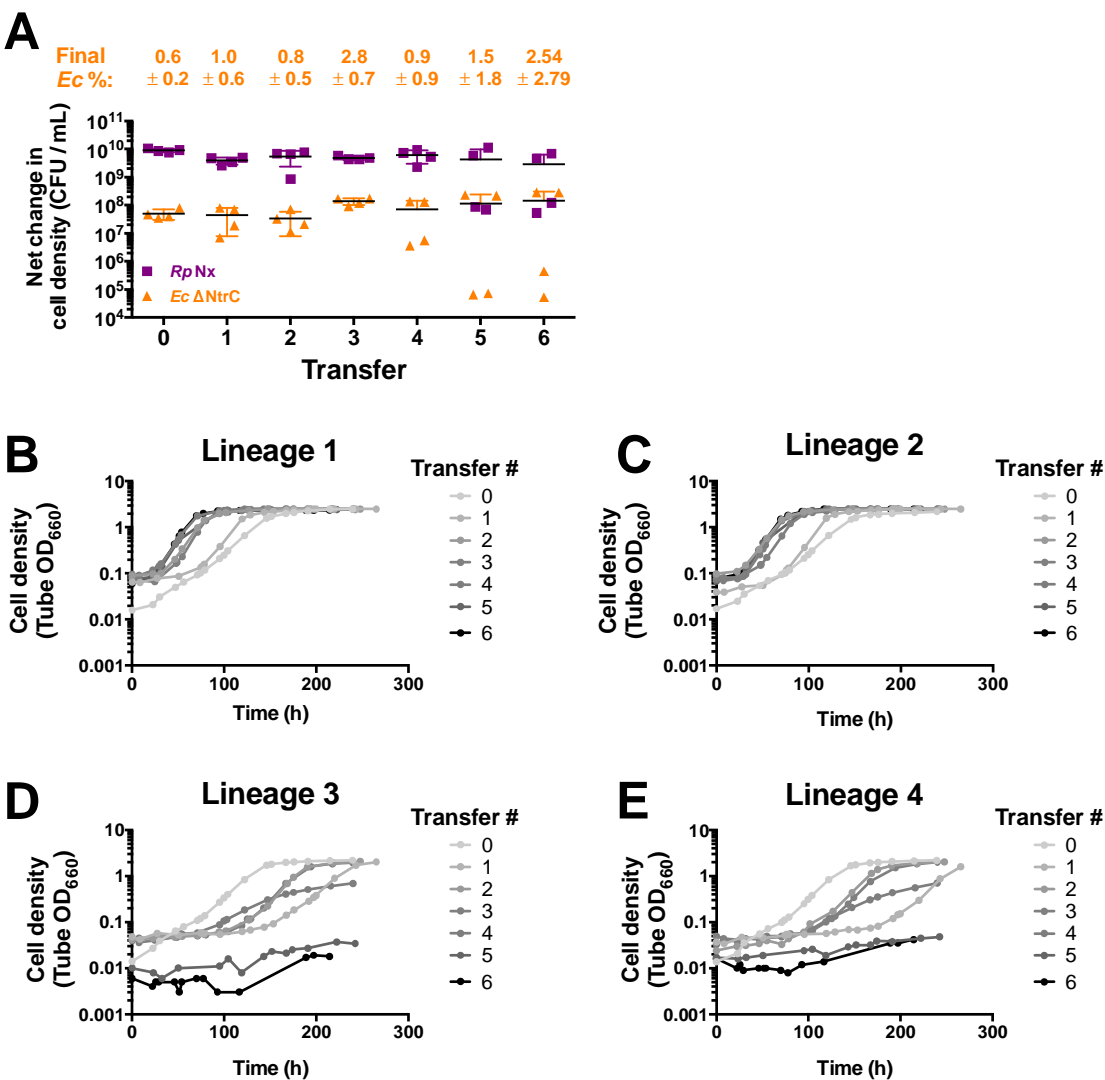

619  
 620 **FIG 5. Lack of *E. coli* NtrC results in variable coculture growth trends across serial transfers.** Net  
 621 changes in cell densities (A) and replicate growth curves (B-E) of cocultures pairing *E. coli* (*Ec*)  $\Delta$ NtrC  
 622 with *R. palustris* (*Rp*) Nx across serial transfers. Cocultures were initially inoculated (Transfer 0) at a 1:1  
 623 starting species ratios based on CFUs/mL from *R. palustris* and *E. coli* monocultures. A 1% inoculum  
 624 was used for each serial transfer. Transfers were performed every 10 d. Error bars indicate SD, n=4.

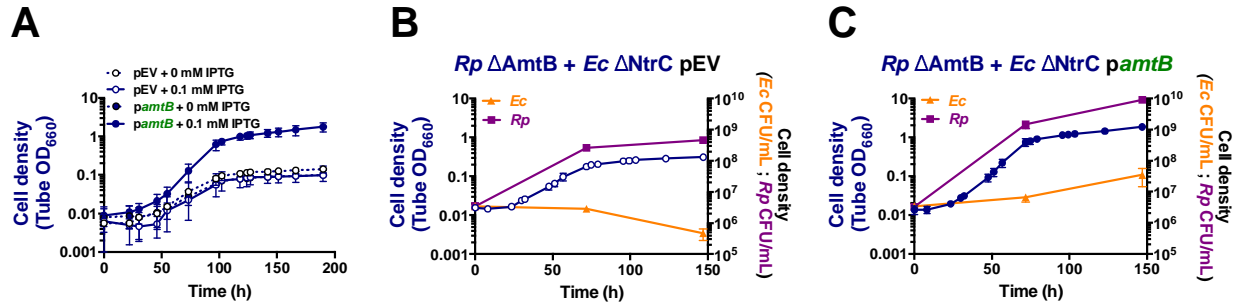

625  
626 **FIG 6. Ectopic expression of *amtB* in *E. coli*  $\Delta$ NtrC permits mutualistic growth with *R. palustris***  
627  **$\Delta$ AmtB.** Growth curves (A-C) and cell densities for each species (B, C) from cocultures pairing *R.*  
628 *palustris* (*Rp*)  $\Delta$ AmtB with *E. coli* (*Ec*)  $\Delta$ NtrC harboring a plasmid encoding an IPTG-inducible copy of  
629 *amtB* (*pamtB*, filled circles) or an empty vector (*pEV*, open circles). To maintain plasmids, all cocultures  
630 were supplemented with 5  $\mu$ g/ml chloramphenicol, which is otherwise lethal to *E. coli* but not to *R.*  
631 *palustris* (Fig. S6). Cocultures were inoculated with a single colony of each species (A) or at a 1:1  
632 starting species ratio based on equivalent CFUs/mL from starter *R. palustris* and *E. coli* monocultures (B,  
633 C). 0.1 mM IPTG was added to the cocultures at the initial time point. Error bars indicate SD, n=3.



634 **Supplemental**

635 **Table S1. Strains and plasmids**

| Strain or plasmid                  | Description or Sequence (5'-3'); <u>Designation in this study</u>                                                        | Source or Purpose |
|------------------------------------|--------------------------------------------------------------------------------------------------------------------------|-------------------|
| <b><i>R. palustris</i> strains</b> |                                                                                                                          |                   |
| CGA009                             | Wild-type strain; spontaneous Cm <sup>R</sup> derivative of CGA001                                                       | (45)              |
| CGA4005                            | CGA009 $\Delta hupS \Delta uppE nifA^*$ ; <u>Nx</u>                                                                      | (10)              |
| CGA4021                            | CGA4005 $\Delta amtB1 \Delta amtB2$ ; <u>Nx<math>\Delta</math>AmtB</u>                                                   | (10)              |
| CGA4026                            | CGA009 $\Delta hupS \Delta uppE \Delta amtB1 \Delta amtB2$ ; <u><math>\Delta</math>AmtB</u>                              | (12)              |
| <b><i>E. coli</i> strains</b>      |                                                                                                                          |                   |
| MG1655                             | Wild-type K12 strain; <u>WT</u>                                                                                          | (53)              |
| K-12 JW1483                        | Keio collection $\Delta ddpX::Km$                                                                                        | (54)              |
| K-12 JW5240                        | Keio collection $\Delta ddpA::Km$                                                                                        | (54)              |
| K-12 JW0997                        | Keio collection $\Delta rutA::Km$                                                                                        | (54)              |
| K-12 JW2307                        | Keio collection $\Delta argT::Km$                                                                                        | (54)              |
| K-12 JW5510                        | Keio collection $\Delta patA::Km$                                                                                        | (54)              |
| K-12 JW0838                        | Keio collection $\Delta potF::Km$                                                                                        | (54)              |
| K-12 JW3840                        | Keio collection $\Delta ntrC::Km$                                                                                        | (54)              |
| K-12 pCA24N (pASKA)                | ASKA collection pCA24N                                                                                                   | (52)              |
| MG1655 pCA24N -GFP                 | ASKA collection pCA24N with gfp removed using NotI digest                                                                | This study        |
| K-12 JW0441-AM pASKAamtB           | ASKA collection pCA24N-N-His-amtB (gfp minus)                                                                            | (52)              |
| MG1655 $\Delta$ DdpX               | MG1655 $\Delta ddpX::Km$ ; <u><math>\Delta</math>DdpX</u>                                                                | This study        |
| MG1655 $\Delta$ DdpA               | MG1655 $\Delta ddpA::Km$ ; <u><math>\Delta</math>DdpA</u>                                                                | This study        |
| MG1655 $\Delta$ RutA               | MG1655 $\Delta rutA::Km$ ; <u><math>\Delta</math>RutA</u>                                                                | This study        |
| MG1655 $\Delta$ ArgT               | MG1655 $\Delta argT::Km$ ; <u><math>\Delta</math>ArgT</u>                                                                | This study        |
| MG1655 $\Delta$ PatA               | MG1655 $\Delta patA::Km$ ; <u><math>\Delta</math>PatA</u>                                                                | This study        |
| MG1655 $\Delta$ PotF               | MG1655 $\Delta potF::Km$ ; <u><math>\Delta</math>PotF</u>                                                                | This study        |
| MG1655 $\Delta$ NtrC               | MG1655 $\Delta ntrC::Km$ ; <u><math>\Delta</math>NtrC</u>                                                                | This study        |
| MG1655 pEV                         | MG1655 pCA24N; <u>WT pEV</u>                                                                                             | This study        |
| MG1655 $\Delta$ NtrC pEC           | MG1655 $\Delta ntrC::Km$ pCA24N; <u><math>\Delta</math>NtrC pEV</u>                                                      | This study        |
| MG1655 <i>pamtB</i>                | MG1655 pCA24N-N-His- <i>amtB</i> +; <u>WT <i>pamtB</i></u>                                                               | This study        |
| MG1655 $\Delta$ NtrC <i>pamtB</i>  | MG1655 $\Delta ntrC::Km$ pCA24N-N-His- <i>amtB</i> +; <u><math>\Delta</math>NtrC <i>pamtB</i></u>                        | This study        |
| <b>Plasmids</b>                    |                                                                                                                          |                   |
| pCA24N                             | Cm <sup>R</sup> ; ASKA collection empty vector with IPTG-inducible promoter                                              | (52)              |
| pCA24N- <i>amtB</i> +              | Cm <sup>R</sup> ; ASKA collection vector with IPTG-inducible promoter in front of N-terminal His-tagged <i>amtB</i> gene | (52)              |
| <b>Primers</b>                     |                                                                                                                          |                   |

|            |                                 |                                                                             |
|------------|---------------------------------|-----------------------------------------------------------------------------|
| ALM47      | cggaaagcgcagcaatTTTTgt          | <i>ddpX</i> upstream flanking region ( <i>E. coli</i> )                     |
| ALM48      | gagcaatgtgggacgaaacg            | <i>ddpX</i> downstream flanking region ( <i>E. coli</i> )                   |
| ALM45      | atatcccctggcacacagc             | <i>ddpA</i> upstream flanking region ( <i>E. coli</i> )                     |
| ALM46      | ccagcagcgttggcgtaaaata          | <i>ddpX</i> downstream flanking region ( <i>E. coli</i> )                   |
| ALM51      | ccgcttgcaacaagcc                | <i>rutA</i> upstream flanking region ( <i>E. coli</i> )                     |
| ALM52      | atcagcgcactttgctgc              | <i>rutA</i> downstream flanking region ( <i>E. coli</i> )                   |
| ALM49      | gcaaacacacacacaatacacaac        | <i>argT</i> upstream flanking region ( <i>E. coli</i> )                     |
| ALM50      | ccatcaggtacagcttcca             | <i>argT</i> downstream flanking region ( <i>E. coli</i> )                   |
| ALM53      | tgaaagcgtgctgtaacgc             | <i>patA</i> upstream flanking region ( <i>E. coli</i> )                     |
| ALM54      | atcccgattttcgcgatcg             | <i>patA</i> downstream flanking region ( <i>E. coli</i> )                   |
| ALM55      | ctggccgggagaaagtct              | <i>potF</i> upstream flanking region ( <i>E. coli</i> )                     |
| ALM56      | ttacgggttttcgcctgc              | <i>potF</i> downstream flanking region ( <i>E. coli</i> )                   |
| MO 7       | caatctttacacacaagctgtgaatc      | <i>ntrC</i> upstream flanking region ( <i>E. coli</i> )                     |
| MO 8       | cctgcctatcaggaataaaagg          | <i>ntrC</i> downstream flanking region ( <i>E. coli</i> )                   |
| pCA24N.for | gataacaatttcacacagaattcattaagag | ASKA pCA24N upstream into IPTG-inducible promoter upstream of cloned gene   |
| pCA24N.rev | cccattaacatcaccatctaattcaac     | ASKA pCA24N downstream into IPTG-inducible promoter upstream of cloned gene |

636

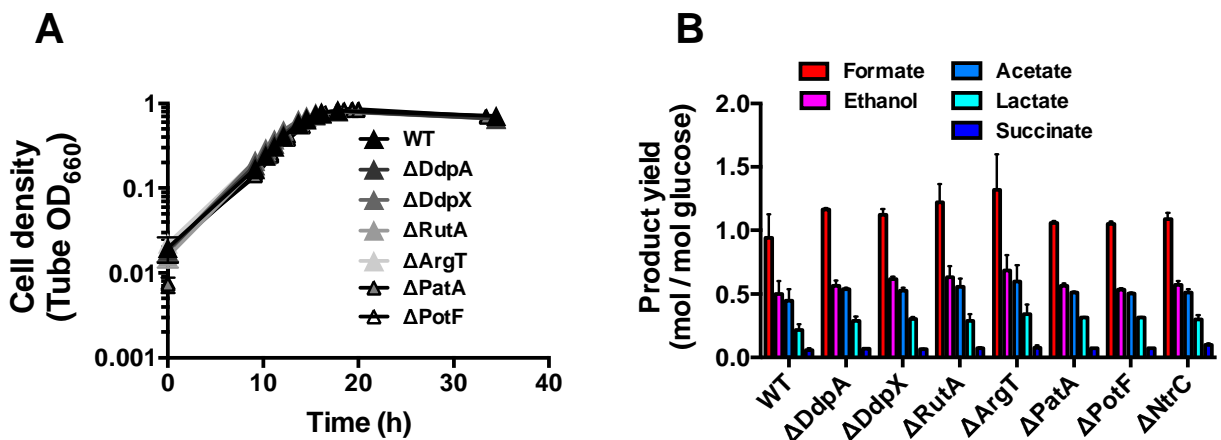

637  
 638 **FIG S1. Single deletions of *E. coli* genes that were upregulated in coculture no effect in monoculture**  
 639 **with 15 mM NH<sub>4</sub><sup>+</sup>.** Growth curves (A) and product yields (B) from *E. coli* monocultures grown with 15  
 640 mM NH<sub>4</sub>Cl. Product yields were taken in stationary phase. Error bars indicate SD, n=3.  
 641

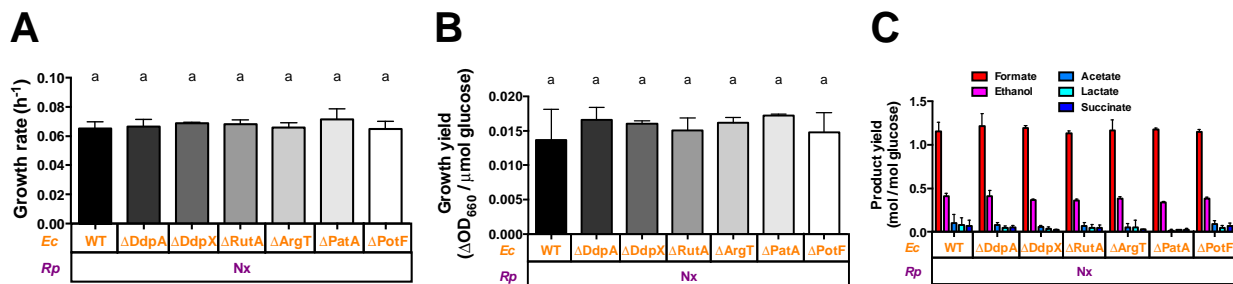

642  
 643 **FIG S2. Additional trends from cocultures pairing *R. palustris* Nx with *E. coli* single deletion**  
 644 **mutants.** Growth rates (A), growth yields (B), and product yields (C) after a one-week culturing period  
 645 from cocultures pairing *E. coli* mutants with deletions in highly upregulated genes with *R. palustris* Nx.  
 646 Growth and product yields were taken at the final time point indicated in Fig. 3A. Cocultures were started  
 647 with a 1% inoculum of stationary starter cocultures grown from single colonies. Error bars indicate SD,  
 648 n=3. Different letters indicate statistical differences, p < 0.05, determined by one-way ANOVA with  
 649 Tukey's multiple comparisons posttest.

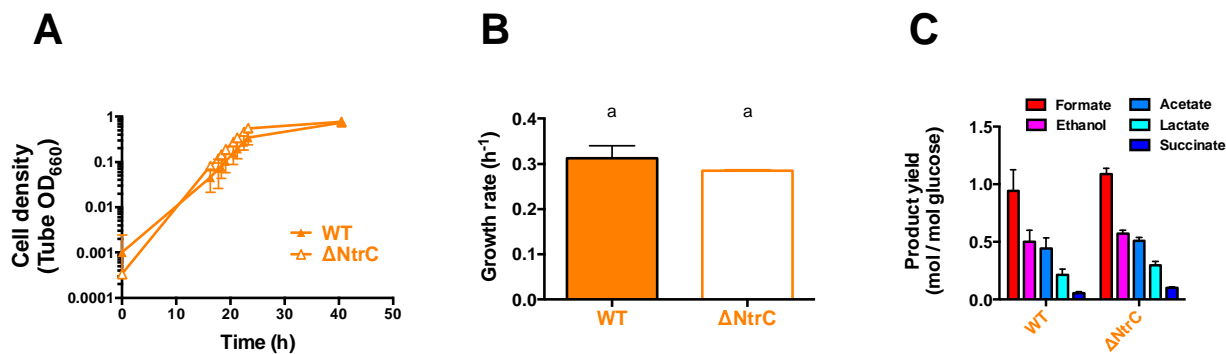

650  
 651 **FIG S3. *E. coli* ΔNtrC growth and metabolic trends are similar to those of WT *E. coli* in**  
 652 **monoculture with 15 mM NH<sub>4</sub><sup>+</sup>.** Growth curves (A), growth rate (B) and product yields (C) from WT *E.*  
 653 *coli* (filled) or ΔNtrC (open) monocultures grown with 15 mM NH<sub>4</sub>Cl. Product yields were taken in  
 654 stationary phase. Error bars indicate SD, n=3.  
 655

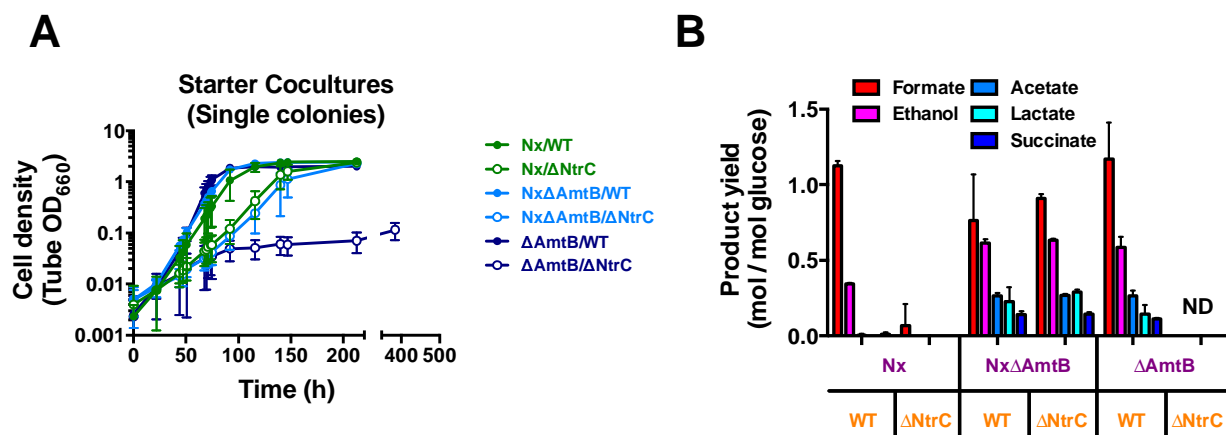

656  
 657 **FIG S4. Additional trends from cocultures of *E. coli* ΔNtrC paired with different *R. palustris***  
 658 **partners.** Growth curves of starter cocultures inoculated with single colonies of each species (A) and  
 659 product yields from test cocultures (B). Product yields (B) were taken at the final time point indicated in  
 660 the respective growth curve in Fig. 4. Test cocultures were started with a 1% inoculum of stationary  
 661 starter cocultures. Error bars indicate SD, n=3. ND, not determined.

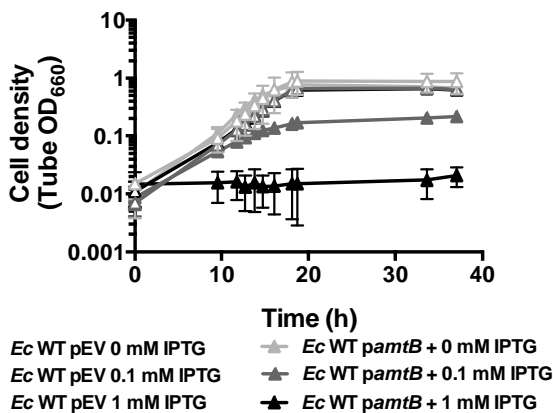

662

663 **FIG S5. Increased *amtB* expression is harmful to *E. coli* in monocultures with 15 mM NH<sub>4</sub><sup>+</sup>.** Growth

664 curves of WT *E. coli* monocultures harboring a plasmid encoding an IPTG-inducible copy of *amtB*

665 (*pamtB*, filled) or empty vector (pEV, open) and grown at different IPTG concentrations. All

666 monocultures were supplemented with 15 mM NH<sub>4</sub>Cl and 5 μg/ml chloramphenicol to maintain the

667 plasmid. Cultures were inoculated with a 1% inoculum from stationary monocultures grown in 0 mM

668 IPTG. After inoculation, IPTG was added to the indicated final concentration. Error bars indicate SD,

669 n=3. ND, not determined.

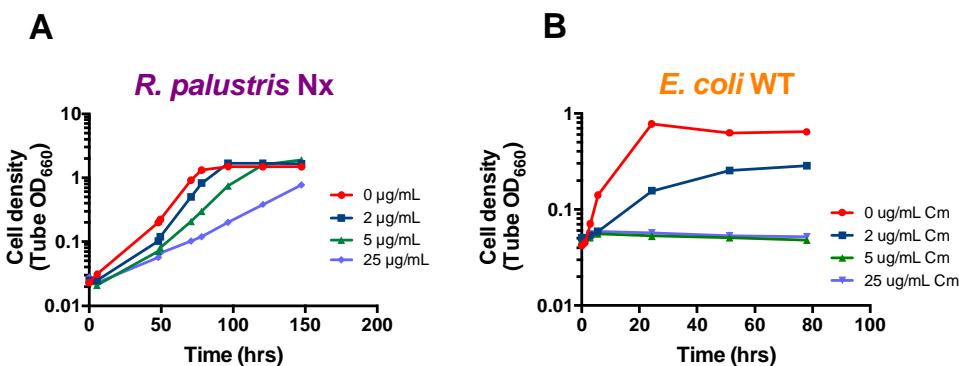

670

671 **FIG S6. Determination of a chloramphenicol concentration to maintain *pamtB* in *E. coli* without**

672 **harming *R. palustris*.** Representative growth curves of *R. palustris* Nx (A) and WT *E. coli* (B) at

673 different concentrations of chloramphenicol. All cultures were grown anaerobically in MDC with a 1%

674 inoculum from stationary monocultures. *R. palustris* Nx was provided 20 mM sodium acetate as a carbon

675 source with a 100% N<sub>2</sub> headspace for nitrogen. WT *E. coli* was provided 25 mM glucose, 10 mM cation

676 solution, and 15 mM NH<sub>4</sub>Cl.
